# Supplementary material for: miR-125-chinmo pathway regulates dietary restriction-dependent enhancement of lifespan in Drosophila
Source: eLife. 2021 Jun 8;10:e62621. doi: 10.7554/eLife.62621 (PMC8233039; doi:10.7554/eLife.62621)
Supplement: Figure 1—figure supplement 2—source data 2. [file elife-62621-fig1-figsupp2-data2.xlsx]

## Sheet: Survival Fig1_exp1 Fig supp 2A
Age (Days)	AL	DR
0	100	100
10	98.9899
12	97.9798
14	95.9596
16	91.9192
18	87.8788
20	75.7576
26	62.6263	95.9184
28	43.4343
30	30.303	93.8776
32	20.202
34	18.1818	88.7755
36	12.1212	85.7143
38	11.1111	82.6531
40	8.08081	81.6327
42	7.07071	77.551
44	5.05051	71.4286
46	4.0404	69.3878
48	1.0101	62.2449
50	0	60.2041
52		59.1837
54		52.0408
58		42.8571
60		35.7143
62		33.6735
64		24.4898
66		17.3469
70		10.2041
72		5.10204
74		2.04082
82		1.02041
90		0

## Sheet: Survival Fig1_exp2 Fig supp 2A
Days	AL	DR
0	100	100
2	98.0769	99.3827
4	95.5128
6	94.2308	98.1481
8		97.5309
10	92.9487	94.4444
12	82.6923	93.8272
14	80.1282	91.358
16	73.7179	88.2716
18	63.4615	87.037
20	60.2564	86.4198
22	44.2308	79.6296
24	43.5897
26	35.2564	77.1605
28	20.5128	72.8395
30		68.5185
32	15.3846	66.0494
34	11.5385	61.7284
36	5.76923	55.5556
38	4.48718	50.6173
40	3.84615	45.679
42	1.92308	36.4198
44	0.641026	31.4815
46		29.0123
48		26.5432
50		22.2222
52		17.9012
54	0	17.284
56		14.8148
58		11.1111
60		10.4938
64		9.87654
66		6.17284
70		3.7037
72		1.85185
78		1.23457
80		0.617284
82		0

## Sheet: Survival Fig1_Fig supplement 2E
Days	AL	DR
0	100	100
2	94.5455	92.9204
4	91.8182	88.4956
6	87.2727	86.7257
8	84.5455	84.9558
10	83.6364	83.1858
12	79.0909	81.4159
14	74.5455
16	72.7273	76.1062
18	58.1818	73.4513
20	52.7273	71.6814
22	33.6364	64.6018
24	27.2727	63.7168
26	19.0909	61.9469
28	14.5455
30	9.09091	57.5221
32	5.45455	50.4425
34	2.72727	45.1327
36	0.909091	39.823
38	0	36.2832
40		34.5133
42		32.7434
44		30.9735
46		29.2035
48		16.8142
50		14.1593
52		11.5044
54		3.53982
58		1.76991
62		0

## Sheet: Survival Fig1_Fig supplement 2F
Days	AL	DR
0	100	100
4	99.0566
10	98.1132
12	96.2264
14		98.2143
22		97.3214
24		96.4286
26	95.283
28	87.7358	94.6429
30		92.8571
32	80.1887	91.9643
34	78.3019	88.3929
36	74.5283
38	65.0943	86.6071
40	62.2642
42	55.6604	83.0357
44	48.1132	82.1429
48	37.7358
50	30.1887
52	14.1509	78.5714
54	11.3208
56	10.3774	75.8929
58	3.77358	65.1786
60	2.83019	60.7143
62		55.3571
64	0	54.4643
66		53.5714
68		50.8929
70		47.3214
72		41.9643
74		38.3929
76		36.6071
78		34.8214
80		33.9286
82		32.1429
86		30.3571
88		26.7857
90		23.2143
92		19.6429
94		17.8571
96		12.5
98		1.78571
102		0.892857
106		0

## Sheet: Survival Fig1_Fig supplement 2G
Days	AL	DR
0	100	100
2	95.6835
4	89.2086	97.5
8	87.0504
10	86.3309	96.25
12	85.6115	95.625
14		91.875
16	82.7338	90.625
18	80.5755	86.875
20	78.4173	85
22	75.5396	83.75
24	61.8705	80.625
26	56.8345	76.875
28	48.2014	72.5
30	39.5683	70.625
32	26.6187	65.625
34	9.35252	58.75
36	7.19424	50.625
38	2.15827	50
40		36.875
42	0	27.5
44		22.5
46		15
48		13.125
50		10
52		6.875
54		6.25
58		1.875
62		0

## Sheet: Survival Fig1_Fig supplement 2H
days	AL	DR
0	102	100
2	102	100
4	101	97
6	96
8	95	94
10	94	90
12		88
14		87
16		85
18	93
20	91
22		83
24	88	79
26	87	77
28	80	76
30	73	74
32	64
34	61	73
36	53
40	45	66
44	41
46	32	58
48	28	54
50	20	42
52		40
54	11	34
56		32
58		22
60		16
62		11
68		9
70		3
72		1

## Sheet: Survival Fig1_Fig supplement 2I
Days	AL	DR
0	100	100
2	96.1165	94.9367
4	82.5243	92.4051
6	70.8738
8	62.1359	91.1392
10	61.165
12	48.5437
14	47.5728
16	42.7184
18	36.8932	88.6076
20	33.9806
22		86.0759
24	30.0971	84.8101
28	21.3592	83.5443
30	18.4466
32	12.6214
34	6.79612
38	0
42		81.0127
46		70.8861
48		69.6203
50		49.3671
54		36.7089
56		26.5823
58		16.4557
60		8.86076
62		5.06329
66		2.53165
70		1.26582
72		0

## Sheet: Survival Fig1_Fig supplement 2J
Days	AL	DR
0	100	100
6	97.5904
8	92.7711
10	83.1325
12	78.3133	97.9167
14	67.4699
16	63.8554	96.875
18	54.2169	95.8333
20	45.7831	94.7917
22	44.5783
24	38.5542	93.75
26	37.3494	92.7083
28		91.6667
30		88.5417
34	34.9398
36	26.506	82.2917
38	24.0964
40		80.2083
42	14.4578	50
44	0	48.9583
48		43.75
50		41.6667
56		23.9583
60		21.875
64		17.7083
68		12.5
72		9.375
74		5.20833
76		0

## Sheet: Survival Fig1_Exp2 Fig supp 2J
Days	AL	DR
0	100	100
6	99.3377
8	98.6755
10	97.351
12	93.3775	97.8417
14	87.4172	91.3669
16	84.7682	89.2086
18	72.8477	87.0504
20	68.8742	83.4532
22	58.2781	82.7338
24	48.3444	80.5755
26	33.7748	79.1367
28	23.8411	76.9784
30	14.5695	74.1007
32	9.27152	71.223
34	6.62252	66.9065
36	0.662252	58.9928
38		53.2374
40		46.7626
42	0	35.2518
44		25.8993
46		18.705
48		7.91367
50		1.43885
52		0

## Sheet: Survival Fig1_Fig supplement 2K
Days	AL	DR
0	91	100
4	91
6	89	100
8	88
10	87	98
16	86	96
18	82	95
20	81	90
22	79	89
24	76	86
26	74	81
28	68	79
30	52	77
32	46	76
34	32
36	20	73
38	5	67
40	3
42	2	64
44		57
46		51
48		48
50		36
52		34
56		31
58		25
60		18
62		11
64		7
66		6
70		4

[truncated: 1 more sheets: Survival Fig1_Fig supplement 2L]
