# Supplementary material for: miR-125-chinmo pathway regulates dietary restriction-dependent enhancement of lifespan in Drosophila
Source: eLife. 2021 Jun 8;10:e62621. doi: 10.7554/eLife.62621 (PMC8233039; doi:10.7554/eLife.62621)
Supplement: Figure 1—source data 2. [file elife-62621-fig1-data2.xlsx]

## Sheet: Survival Exp 1_Figure 1H
Days	DR	AL
0	100	100
4	95.876	97.895
6	93.814	96.842
10	92.784	95.789
12		91.579
14		89.474
16	91.753	88.421
18		87.368
20	90.722
22	89.691
24		86.316
26	88.66	73.684
28	86.598	69.474
30		63.158
32		60
34	84.536	50.526
36	81.443	43.158
38	80.412	40
40	79.381	34.737
42	76.289	29.474
44	73.196	26.316
46	72.165	22.105
48	71.134	13.684
50		10.526
52	69.072
54		4.211
56	57.732	2.105
58	56.701
60	55.67	0
62	43.299
64	39.175
66	36.082
68	30.928
70	17.526
74	13.402
76	7.216
78	6.186
82	0

## Sheet: Survival Exp2_Figure 1H
Days	AL	DR
0	100	100
2	94.7368	99.0654
4	92.9825	96.2617
6	90.3509
10	89.4737	95.3271
12	88.5965
14	81.5789	93.4579
16	78.9474	87.8505
18	77.193	86.9159
20	71.0526	82.243
22	63.1579	78.5047
24	51.7544	73.8318
26	45.614	72.8972
28	35.9649	67.2897
30	28.9474	65.4206
32	16.6667	54.2056
34	9.64912	52.3364
36	3.50877	48.5981
38	0.877193	44.8598
40	0	43.9252
42		40.1869
44		36.4486
46		32.7103
48		29.9065
50		18.6916
52		8.41121
54		7.47664
56		6.54206
58		0

## Sheet: Survival Exp1_Figure1I
DAYS	AL	DR
0	100	100
4	99.099
6	96.396
8	94.595
10	92.793	98.611
12	87.387	95.833
14	82.883
16	76.577	86.111
18	68.468	80.556
20	63.063	73.611
22	50.45	68.056
24	41.441	59.722
26	37.838	51.389
28		50
30	18.919	43.056
32	7.207	37.5
34		31.944
36	0	30.556
38		13.889
40		8.333
42		0

## Sheet: Survival Exp2_Figure 1I
Days	AL	DR
0	100	100
4	97.619	97.3333
6	95.2381
8	82.1429
10	80.9524
12	75
14		93.3333
16	71.4286	92
18	70.2381	85.3333
20		84
22	45.2381	82.6667
24	44.0476	68
26	38.0952	65.3333
28	35.7143	62.6667
30	25	45.3333
32	4.7619	44
34	3.57143	25.3333
36	0	24
38		20
40		16
42		8
44		0

## Sheet: Survival Exp 1_Figure 1J
Days	DR	AL
0	100	100
2	99.351	99.375
4		98.75
8	97.403	97.5
10		95.625
12	96.104
14	94.805	94.375
16	94.156
18		92.5
20	93.506
22	92.208	88.125
24	90.909	85
26		78.75
28	90.26	75.625
30	89.61	71.25
32	87.662	65.625
34	86.364	58.75
36	83.117	51.25
38	81.818	45
40	78.571	40
42	76.623	32.5
44	73.377	26.875
46	69.481	21.875
48	68.182	16.25
50	62.987	11.25
52	56.494	8.125
54	51.948	6.875
56	48.701	5
58	44.805	3.75
60	39.61	2.5
62	34.416	1.875
64	32.468	1.25
66	29.221	0.625
68	25.325	0
70	22.727
72	20.13
74	16.234
76	12.987
78	8.442
80	7.143
82	6.494
84	5.195
86	3.896
88	3.247
90	1.299
96	0

## Sheet: Survival Exp2_Figure 1J
Days	DR	AL
0	100	100
4	97.9592	99.4624
6	97.2789
8	95.9184
10	90.4762	98.9247
12	88.4354	98.3871
14	87.7551	97.3118
16	86.3946	96.7742
18	85.7143	95.6989
20	84.3537
22	83.6735	91.9355
24	81.6327	86.5591
26	80.9524	82.7957
28	78.9116	74.7312
30	75.5102	67.2043
32	70.068	61.828
34	65.9864	54.3011
36	63.9456	42.4731
38	60.5442	33.3333
40	53.7415	24.7312
42	50.3401	16.6667
44	46.2585	14.5161
46	42.8571	12.3656
48	39.4558	10.2151
50	38.7755	7.52688
52	36.7347	6.45161
54		5.37634
56	35.3741
58	31.2925
60	29.932	4.30108
62	28.5714	3.76344
64	27.2109	2.68817
66	25.8503	1.6129
68	23.8095
70	21.7687	0.537634
72	19.0476	0
74	17.0068
76	11.5646
78	8.16327
80	6.80272
84	4.7619
86	3.40136
88	2.72109
90	2.04082
92	1.36054
96	0

## Sheet: Survival Exp 1_Figure 1K
Days	DR	AL
0	100	100
2		99.497
4		98.492
6	98.378	95.98
8	96.216	92.965
10	92.432	89.95
12	90.811
14	88.649	87.94
16		87.437
18	87.568	85.427
20		83.417
22	86.486	81.91
24		77.387
26	83.243	67.337
28	81.622	64.824
30	76.757	50.251
32	71.892	42.714
34	62.162	35.678
36	54.054	29.648
38	44.865	25.126
40	40	20.603
42	34.054	17.588
44	31.892	11.558
46	28.649	10.553
48	24.865	8.04
50	21.081	4.523
52	18.919	2.01
54	16.757	1.005
56	15.676	0
58	14.054
60	12.432
62	10.27
64	8.649
66	6.486
68	5.405
70	2.162
72	1.622
74	0.541
76	0

## Sheet: Survival Exp2_Figure 1K
Days	AL	DR
0	100	100
2		99.4898
4	97.6303	97.449
6	94.7867	93.3673
8	92.891
10	90.9953	90.3061
12	90.5213
14	88.6256	85.2041
16		84.1837
18	87.6777	82.6531
20	85.782	81.6327
22	76.7773	80.6122
24	67.7725	77.0408
26	54.5024
28	42.654	75
30	37.4408	72.449
32	29.8578	68.8776
34	25.1185	65.3061
36	20.8531	57.6531
38	18.9573	56.6327
40	15.1659	54.0816
42	12.7962
44	9.47867	52.0408
46	7.58294	48.9796
48	4.73934	44.3878
50	3.79147	40.3061
52	2.36967	34.6939
54	0.947867	29.5918
56	0	26.5306
58		25
60		22.449
62		19.3878
64		16.8367
66		14.2857
68		10.7143
70		7.65306
72		6.12245
74		3.57143
76		2.04082
78		0.510204
82		0

## Sheet: Survival Exp1_Figure 1L
Days	DR	AL
0	100	100
2	98.8235
4	96.4706	97.6744
6		90.6977
8	91.7647	79.0698
10	89.4118	74.4186
12	85.8824	67.4419
14	83.5294	62.7907
16	76.4706	53.4884
18	70.5882	47.6744
20	63.5294	38.3721
22	56.4706	34.8837
24	45.8824	26.7442
26	30.5882	22.093
28	21.1765	13.9535
30	8.23529	10.4651
32	5.88235	4.65116
34	3.52941	2.32558
38	2.35294	1.16279
40	0
42		0

## Sheet: Survival Exp 2_Figure 1L
Days	DR	AL
0	100	100
4	99.115	95.349
6		86.047
8	94.69	80.233
10	93.805	79.07
12	92.92	76.744
14	92.035	73.256
16	86.726	69.767
18	79.646	58.14
20	71.681	44.186
22	53.097	33.721
24	41.593	27.907
26	26.549	19.767
28	16.814	12.791
30	8.85	9.302
32	3.54	4.651
34	2.655
36	0.885	2.326
38		1.163
40	0	0

[truncated: 2 more sheets: Survival Exp 1_Figure 1M, Survival Exp2_Figure 1M]
