# Supplementary material for: miR-125-chinmo pathway regulates dietary restriction-dependent enhancement of lifespan in Drosophila
Source: eLife. 2021 Jun 8;10:e62621. doi: 10.7554/eLife.62621 (PMC8233039; doi:10.7554/eLife.62621)
Supplement: Figure 2—figure supplement 1—source data 2. [file elife-62621-fig2-figsupp1-data2.xlsx]

## Sheet: Figure 2_Fig supplement 1A
Days	AL-	AL+	DR-	DR+
0	100	100	100	100
2	99.0741
4				98.0583
6	94.4444	97.9798
8		94.9495	98.9583
10	88.8889			97.0874
12				94.1748
14	87.963	90.9091
16				93.2039
18	82.4074	89.899
20	81.4815
22	79.6296	87.8788	95.8333	92.233
24	76.8519	78.7879
26	75	73.7374	94.7917	91.2621
28	62.037	61.6162	89.5833
30	55.5556	53.5354		90.2913
32	38.8889	32.3232	84.375	88.3495
34	21.2963	23.2323
36	12.963	13.1313	79.1667	85.4369
38	8.33333	9.09091	77.0833
40	2.77778	4.0404	75	82.5243
42		3.0303		78.6408
44	0	0
46			66.6667	74.7573
48				70.8738
50			62.5	61.165
52			60.4167	59.2233
54			55.2083	54.3689
56			45.8333
58				53.3981
60			34.375	52.4272
64			27.0833	43.6893
70			17.7083	33.0097
74			12.5	15.534
76			11.4583
78			9.375	7.76699
80			8.33333
82			4.16667	0.970874
84			1.04167
90				0
92			0

## Sheet: Figure 2_Fig supplement 1B
Days	AL	DR
0	100	100
2	99.0385
4	98.0769	97.7778
6	97.1154
8		96.6667
10		95.5556
12	96.1538
14		94.4444
16	94.2308
18		91.1111
20	89.4231	88.8889
22	85.5769	87.7778
24	77.8846	82.2222
26	73.0769	81.1111
28	65.3846	80
30	63.4615	76.6667
32	61.5385
34	59.6154	72.2222
36	55.7692
38	48.0769	68.8889
42	46.1538	63.3333
44	38.4615	62.2222
46	36.5385	61.1111
48	29.8077
50	26.9231	57.7778
52	20.1923	56.6667
54	16.3462
56	6.73077	51.1111
58		50
60	0
62		44.4444
66		42.2222
70		31.1111
74		27.7778
78		20
80		18.8889
82		15.5556
84		6.66667
86		0
