# Supplementary material for: miR-125-chinmo pathway regulates dietary restriction-dependent enhancement of lifespan in Drosophila
Source: eLife. 2021 Jun 8;10:e62621. doi: 10.7554/eLife.62621 (PMC8233039; doi:10.7554/eLife.62621)
Supplement: Figure 2—source data 3. [file elife-62621-fig2-data3.xlsx]

## Sheet: Survival_Figure 2C
DAYS	AL	DR
0	100	100
4		96.4286
10	96.25
14	87.5	91.6667
16		89.2857
18	82.5	86.9048
20	67.5	80.9524
22	53.75	72.619
24	40	66.6667
26	25	57.1429
28	13.75	54.7619
30	7.5	50
32	3.75	44.0476
34		38.0952
36	1.25	32.1429
38	0	26.1905
40		20.2381
42		19.0476
44		16.6667
46		15.4762
48		14.2857
50		11.9048
52		9.52381
54		4.7619
56		3.57143
58		2.38095
60		1.19048
62		0

## Sheet: Survival_Figure 2C exp2
DAYS	AL	DR
0	100	100
2	98.8235	98.6842
4		92.1053
6	96.4706
8		86.8421
10	92.9412
12		77.6316
14	84.7059
16		67.1053
18	80	64.4737
20	75.2941	56.5789
22	67.0588	55.2632
24	50.5882	47.3684
26	30.5882	42.1053
28	18.8235	34.2105
30	4.70588	28.9474
32	2.35294	18.4211
34	1.17647	15.7895
36		14.4737
38	0
40		13.1579
42		11.8421
44		10.5263
46		9.21053
54		5.26316
56		2.63158
62		1.31579
64		0

## Sheet: Survival_Figure 2D
DAYS	AL	DR
0	100	100
8	98.8372	99.0099
10	97.6744
12	95.3488
14	94.186
16	84.8837	98.0198
18	76.7442	97.0297
20	69.7674	96.0396
22	61.6279	94.0594
24	48.8372	89.1089
26	34.8837	81.1881
28	27.907	73.2673
30	17.4419	60.396
32	10.4651	37.6238
34	3.48837	30.6931
36	0	23.7624
38		19.802
40		14.8515
42		8.91089
44		3.9604
46		1.9802
48		0.990099
50		0

## Sheet: Survival_Figure 2D exp2
DAYS	AL	DR
0	100	100
2	99.0476
4	97.1429	98.9796
6	96.1905
8	95.2381
10	94.2857
12	90.4762
14	88.5714
16	81.9048	93.8776
18	70.4762	92.8571
20	60	85.7143
22	45.7143	84.6939
24	27.619	75.5102
26	17.1429	60.2041
28	10.4762	46.9388
30	4.7619	37.7551
32	0	24.4898
34		13.2653
36		2.04082
38		1.02041
40		0

## Sheet: Survival_Figure 2E
Days	AL	DR
0	100	100
2	97.2727
4		99.0476
6	96.3636	98.0952
8	95.4545
10		97.1429
12		96.1905
14	94.5455
20	92.7273	95.2381
22	91.8182	93.3333
24	90	90.4762
26	87.2727
28	86.3636	88.5714
30	84.5455	86.6667
32	81.8182
34	75.4545	81.9048
36	70.9091	75.2381
38	60.9091	69.5238
40	39.0909	53.3333
42	22.7273
44	19.0909	51.4286
46	16.3636
48	12.7273
50	7.27273	46.6667
52		43.8095
54		40.9524
56		31.4286
60	2.72727	27.619
62	1.81818
64		24.7619
66		21.9048
68		18.0952
70		15.2381
72	0.909091	12.381
74		11.4286
76	0
78		8.57143
80		2.85714
86		1.90476
94		0.952381
96		0

## Sheet: Survival_Figure 2E exp2
Days	AL	DR
0	100	100
4	98.4375
6		97.9592
8	97.6562	96.5986
10	96.875
12	93.75	95.2381
14	91.4062	92.517
16	88.2812	91.1565
18	84.375
20	80.4688	89.1156
22		87.0748
24	78.125	82.3129
26	73.4375	80.2721
28	72.6562	78.9116
30	64.0625	76.1905
32	60.9375	74.8299
34	57.0312	72.7891
36	50.7812	70.068
38	43.75	67.3469
40	39.8438	65.3061
42	28.9062	59.8639
44	28.125	56.4626
46	22.6562	49.6599
48	18.75	43.5374
50		38.0952
52	13.2812	33.3333
54		27.8912
56	6.25	23.8095
58		23.1293
60	4.6875	21.7687
62		20.4082
64		19.0476
66		15.6463
68		13.6054
70	2.34375	11.5646
72		10.2041
74		8.16327
76	1.5625
80	0.78125	6.80272
82		4.08163
84	0	2.72109
88		1.36054
90		0.680272
98		0

## Sheet: Survival_Figure 2E exp3
Days	AL	DR
0	100	100
2	98.4252
4	96.8504	99.4505
6	92.9134	98.3516
8	92.126	97.8022
10		97.2527
12	90.5512	95.0549
14	89.7638	92.8571
16	88.9764	89.011
18	88.189	84.6154
20	81.1024	82.967
22	75.5906	73.6264
24	72.4409	72.5275
26	66.1417	67.033
28	61.4173	61.5385
30	56.6929	57.1429
32	49.6063	54.3956
34	43.3071	50
36	36.2205	46.1538
38	31.4961	40.1099
40	25.9843	37.9121
42	23.622
44	17.3228	36.2637
46	14.1732	34.6154
48	9.44882	33.5165
50	6.29921	31.3187
52	5.51181	29.1209
54	3.93701	26.9231
56		24.7253
58	3.14961	21.4286
60	2.3622	18.6813
62		17.5824
64	1.5748
66	0.787402
68		15.3846
70		13.7363
72		9.34066
74		7.69231
78	0	5.49451
80		4.94505
82		3.2967
84		2.74725
90		1.0989
94		0.549451
96		0

## Sheet: Survival_Figure 2F
Days	AL	DR
0	100	100
2		98.9796
4	99.1228	97.9592
8	97.3684
10	95.614	96.9388
14		95.9184
18		94.898
20	93.8596
22	89.4737
24	85.0877	92.8571
26	80.7018
28	77.193	91.8367
30	65.7895	89.7959
32	56.1404	88.7755
34	45.614
36	37.7193
38	28.9474
40	21.9298	87.7551
42	19.2982	86.7347
44	16.6667	81.6327
46		80.6122
48	10.5263	72.449
50		67.3469
52	7.89474	60.2041
54	6.14035	53.0612
58	4.38596	42.8571
60	2.63158	37.7551
62	1.75439	35.7143
64	0	30.6122
66		27.551
68		18.3673
70		17.3469
72		11.2245
74		8.16327
76		7.14286
78		5.10204
82		3.06122
88		1.02041
98		0

## Sheet: Survival_Figure 2F exp2
Days	AL	DR
0	100	100
2	97.6471	98.9691
4	94.1176
6		97.9381
8	91.7647	96.9072
10	90.5882
12		95.8763
14	88.2353	93.8144
16	81.1765
18	71.7647	92.7835
20	69.4118
22	67.0588	88.6598
24	61.1765	87.6289
26	60	82.4742
28	48.2353
30	43.5294	80.4124
32	34.1176
34		76.2887
36	27.0588	73.1959
38	22.3529	68.0412
40	21.1765	64.9485
42	16.4706
44		62.8866
46	14.1176
48	11.7647
50	10.5882	60.8247
52	7.05882	56.701
54		49.4845
56	0	48.4536
58		44.3299
60		39.1753
62		32.9897
64		29.8969
66		21.6495
68		19.5876
70		16.4948
72		13.4021
74		11.3402
76		8.24742
78		6.18557
80		2.06186
82		1.03093
86		0

## Sheet: Survival_Figure 2F exp3
Days	AL	DR
0	100	100
2	97.8947
4		96.2264
6	95.7895	92.4528
8	91.5789	91.5094
10	89.4737	88.6792
12	85.2632	83.0189
14	77.8947	82.0755
16	75.7895	76.4151
18	67.3684	71.6981
20	63.1579	69.8113
22	53.6842	68.8679
24	47.3684	67.9245
26	38.9474	65.0943
28	35.7895	61.3208
30	21.0526	56.6038
32	15.7895	55.6604
34	13.6842	52.8302
36	9.47368	50
38	6.31579	48.1132
40	3.15789	43.3962
42		41.5094
44	2.10526	33.0189
46	1.05263	25.4717
48		18.8679
50		15.0943
56		14.1509
60	0	13.2075
62		9.43396
64		8.49057
70		7.54717
74		6.60377
76		5.66038
86		2.83019
88		1.88679
94		0
