# Supplementary material for: miR-125-chinmo pathway regulates dietary restriction-dependent enhancement of lifespan in Drosophila
Source: eLife. 2021 Jun 8;10:e62621. doi: 10.7554/eLife.62621 (PMC8233039; doi:10.7554/eLife.62621)
Supplement: Figure 3—source data 2. [file elife-62621-fig3-data2.xlsx]

## Sheet: Survival_Figure 3G Exp 1
DAYS	DR+RU	DR+ETOH	AL+RU	AL+ETOH
0	100	100	100	100
14				93.8144
16	98.8636			92.7835
18		99.2754		90.7216
20				86.5979
22				83.5052
24				79.3814
26		98.5507
28			97.9592	72.1649
30	97.7273		95.9184	71.134
32				68.0412
34			90.8163	58.7629
36	94.3182	96.3768	87.7551
38	92.0455	92.7536	80.6122	55.6701
40	84.0909	92.029		51.5464
42	82.9545	89.8551	74.4898	44.3299
44	80.6818	86.9565	67.3469	39.1753
46	77.2727	84.7826	64.2857	35.0515
48		77.5362	56.1224	30.9278
50	70.4545	70.2899	48.9796	28.866
52	60.2273	61.5942	47.9592	24.7423
54	57.9545		41.8367	20.6186
56	55.6818	57.2464	40.8163	16.4948
58	52.2727	52.8986	29.5918	12.3711
60	47.7273	52.1739	20.4082
62	40.9091	45.6522	19.3878	10.3093
64		42.7536	14.2857	4.12371
66	37.5	36.2319	11.2245
68	36.3636	33.3333	9.18367	2.06186
70	35.2273	29.7101		1.03093
72	27.2727	26.087	7.14286	0
74	26.1364	22.4638
76		16.6667	5.10204
78	25	13.7681	2.04082
80	22.7273	11.5942	0
82	18.1818	8.69565
84		7.97101
86	15.9091	5.07246
88		1.44928
92	9.09091	0
94	6.81818
96	3.40909
98	2.27273
102	0

## Sheet: Survival_Figure 3G Exp 2
Days	AL+E	AL+RU	DR+E	DR+RU
0	100	100	100	100
6	98.9011	99.4382	99.0244
8	95.6044	98.8764
12	95.0549		98.5366
14	93.956
16	85.7143	98.3146	97.561
18	75.8242		97.0732	99.4413
20	71.978	95.5056	96.5854
22	69.7802		93.6585
24	64.8352	94.382	93.1707
26	58.7912	91.573	85.8537
28	51.6484	83.7079	81.9512	98.324
30	44.5055		80.4878	97.7654
32	37.3626	78.6517	72.6829	95.5307
34	28.5714	70.7865	72.1951
36	24.1758	64.0449	61.9512	89.9441
38	20.8791	55.618	55.6098	84.9162
40	14.8352	42.6966	50.2439	82.6816
42		32.0225	45.8537	73.1844
44	11.5385	20.7865	44.3902	72.067
46	8.79121	19.1011	40.9756	67.0391
48	2.74725	14.0449	37.561	59.7765
50		11.236	31.2195	55.3073
52	2.1978	8.98876	26.8293	51.3966
54	1.64835	5.61798	25.8537	49.7207
56		2.80899	22.9268	48.0447
58	0	2.24719	20.4878	41.8994
60		1.68539	18.5366	40.2235
62			15.6098	36.8715
64		1.1236	15.122	34.6369
66		0.561798	14.1463	30.7263
68				28.4916
70		0		27.3743
72			13.6585	25.6983
74			12.6829	22.3464
76			12.1951	20.6704
78			11.2195	18.4358
80			9.26829	17.8771
82				12.8492
84			8.29268	11.1732
86			6.34146	6.14525
88				5.58659
90			5.85366	5.02793
92			3.41463	3.35196
94			1.95122	2.23464
96			0	0.558659
98				0
