# Supplementary material for: miR-125-chinmo pathway regulates dietary restriction-dependent enhancement of lifespan in Drosophila
Source: eLife. 2021 Jun 8;10:e62621. doi: 10.7554/eLife.62621 (PMC8233039; doi:10.7554/eLife.62621)
Supplement: Figure 6—source data 2. [file elife-62621-fig6-data2.xlsx]

## Sheet: Survival_Fig6B 1Aexp1
DAYS	AL+ETOH	AL+RU	DR+ETOH	DR+RU
0	100	100	100	100
2		97	98.9899
4	98.9796	81		96.8421
6	97.9592	63	97.9798
8	92.8571	51	96.9697	83.1579
10	91.8367	43		67.3684
12		29		60
14	89.7959	19		56.8421
16	85.7143	18		34.7368
18	79.5918	17	94.9495	27.3684
20	74.4898		92.9293	23.1579
22	69.3878			17.8947
24	58.1633	16	89.899	12.6316
26	57.1429		86.8687	10.5263
28	55.102		81.8182
30	52.0408	14	78.7879	9.47368
32	40.8163	11	77.7778
34	29.5918	9	75.7576
36	16.3265		72.7273	8.42105
38	11.2245		63.6364	3.15789
40	9.18367	4	52.5253	2.10526
42	8.16327	3	44.4444
44	7.14286	2
46	6.12245		39.3939
48	3.06122	1	36.3636	1.05263
50	2.04082	0
52			30.303	0
54	1.02041		29.2929
56	0		25.2525
58			22.2222
60			21.2121
62			19.1919
64			18.1818
66			13.1313
70			11.1111
72			8.08081
74			4.0404
78			1.0101
88			0

## Sheet: Survival_Fig6B exp2
Days	AL+ETOH	AL+RU	DR+ETOH	DR+RU
0	100	100	100	100
2	99.5868	97.6852	95.8333
4		82.4074	95.2381	98.324
6	98.7603	68.9815		90.5028
8	97.5207	58.3333	94.6429	88.2682
10	91.3223	52.7778		76.5363
12	90.0826	49.537	91.0714	73.743
14	80.5785	43.9815		55.8659
16	78.9256	39.3519		46.3687
18	76.0331	36.5741	89.881	36.8715
20	72.314	35.1852	86.9048	34.6369
22	62.8099	31.9444	85.7143	34.0782
24	54.1322	24.537	83.3333	30.1676
26	50.8264	19.9074		29.0503
28	36.7769	15.7407	80.9524	26.8156
30	27.686	12.037
32	19.8347	9.72222	77.381	24.581
34	14.876	6.94444	69.0476	20.6704
36	9.91736	5.55556	65.4762	18.4358
38	6.61157	4.62963	61.9048	16.7598
40	5.78512	1.85185	58.3333	11.1732
42	4.95868		54.7619	5.02793
44	3.30579		48.8095	4.46927
46	2.06612	1.38889	48.2143	3.91061
48	0.826446	0.462963	45.2381	1.67598
50	0.413223		39.881	1.11732
52			36.9048
54		0	35.119
56			31.5476	0.558659
58	0		27.381	0
60			22.0238
62			21.4286
64			13.0952
66			9.52381
68			7.7381
70			5.35714
72			3.57143
74			0.595238
80			0

## Sheet: Survival_Fig 6C exp1
Days	AL+E	AL+RU	DR+E	DR+RU
0	100	100	100	100
2	98.9247	97.6526	98.3957	98.0861
4	95.6989	92.0188	95.1872	97.6077
6	94.6237	88.2629	94.1176	94.7368
8	93.5484	83.0986		90.4306
10	91.9355	72.77		84.2105
12	88.7097	65.2582	93.5829	69.8565
14	87.0968	52.1127	92.5134	57.8947
16	77.4194	42.2535		46.4115
18	73.1183	29.108	88.2353	33.9713
20	68.2796	15.0235	86.631	13.3971
22	61.828	6.57277	85.5615	11.4833
24	53.7634	4.22535		10.0478
26	49.4624	3.28638	80.7487	7.6555
28	45.6989	2.34742	80.2139	6.69856
30	37.6344	0.938967	79.1444	4.78469
32	32.2581	0	75.9358
34	22.5806		73.7968	3.82775
36	19.8925		72.1925	1.43541
38	15.5914		70.0535	0.478469
40	13.4409		68.4492
42	12.9032		64.1711	0
44	11.2903		58.2888
46	4.83871		55.0802
48	3.76344		52.9412
50	2.68817		50.2674
52			47.0588
54	2.15054		42.7807
56			37.9679
58	1.07527		34.7594
60	0.537634		28.877
62			22.4599
64	0		14.4385
66			12.2995
68			8.02139
70			6.95187
72			3.74332
74			2.13904
76			1.60428
78			0.534759
80			0

## Sheet: Survival_Fig 6C exp2
Days	AL+E	AL+RU	DR+E	DR+RU
0	100	100	100	100
2	94.8718	97.7099		97.8261
4	89.7436	93.1298	95
6	87.1795			95.6522
8		87.7863
10	85.8974	76.3359	93.75
12		69.4656		92.029
14	83.3333	63.3588		85.5072
16		38.9313	92.5	73.913
18		27.4809		64.4928
20	71.7949	24.4275	90	47.8261
22	69.2308	16.7939		36.2319
24	62.8205	10.687	85	26.8116
26	51.2821	8.39695		5.7971
28			81.25	4.34783
30	42.3077	7.63359	77.5	3.62319
32	35.8974	2.29008	70
34	21.7949	1.52672	61.25	1.44928
36	3.84615	0	57.5
38	0		52.5	0
40			46.25
42			40
44			27.5
46			21.25
48			16.25
50			12.5
52			11.25
54			6.25
60			5
64			2.5
66			1.25
68			0

## Sheet: Survival_Fig 6D exp1
DAYS	DR+RU	DR+ETOH	AL+RU	AL+ETOH
0	100	100	100	100
6			98.5401
8	98		92.7007
10	96		86.1314
12	93		77.3723
14	88		70.8029	86.9159
16	86		54.7445	85.9813
18	76		49.635	85.0467
20	73		42.3358
22	64	98.9899	30.6569	81.3084
24	58		29.927
26	47		22.6277	74.7664
28	32		18.9781	72.8972
30	24	97.9798	16.0584	71.9626
32	21	96.9697	13.8686	71.028
34	16	95.9596	12.4088	68.2243
36	13	93.9394	10.9489	66.3551
38	6		8.75912
40	5	91.9192	7.29927	64.486
42		90.9091	6.56934	57.9439
44		89.899		48.5981
46	4	85.8586	5.83942	40.1869
48	3	83.8384	4.37956	36.4486
50				20.5607
52	1	78.7879	2.91971	15.8879
54	0		0	11.215
56		75.7576
60				10.2804
62		73.7374
64		67.6768		9.34579
66		65.6566
68		59.596		7.47664
70		45.4545		0.934579
72		42.4242
74		37.3737		0
76		35.3535
78		32.3232
80		31.3131
82		25.2525
84		22.2222
86		18.1818
92		13.1313
96		9.09091
98		4.0404
100		3.0303
102		2.0202
104		0

## Sheet: Survival_Fig 6D exp2
DAYS	DR+RU	DR+ETOH	AL+RU	AL+ETOH
0	100	100	100	100
4			99.1228
6	96.8421		95.614
8	90.5263		93.8596
10	86.3158		78.0702	99.3007
12	82.1053		74.5614
14	75.7895	92.1569	55.2632	98.6014
16	54.7368
18	51.5789	91.1765	49.1228	97.2028
20	48.4211		40.3509	93.007
22	46.3158	90.1961
24	40		35.0877
26	30.5263	87.2549	27.193
28	24.2105		25.4386	92.3077
30	23.1579	85.2941	21.0526	86.7133
32	17.8947		9.64912	83.9161
34		82.3529	7.89474
36	16.8421	81.3725		72.028
38	12.6316	79.4118	7.01754	64.3357
40	11.5789			55.9441
42		74.5098		43.3566
44		69.6078		39.1608
46			6.14035	25.1748
48	8.42105	62.7451		20.979
50		59.8039		17.4825
52	7.36842	57.8431		11.1888
54	4.21053			9.09091
56	3.15789	50.9804
58		50	1.75439	5.59441
60		45.098	0	4.8951
62	2.10526	39.2157		3.4965
64		32.3529		2.0979
66	0	31.3725
68		29.4118		0.699301
70		24.5098
74		20.5882
76		18.6275		0
80		17.6471
82		9.80392
84		8.82353
90		7.84314
92		1.96078
100		0.980392
104		0

## Sheet: Survival_Fig 6E exp1
DAYS	AL+RU	AL+ETOH	DR+RU	DR+ETOH
0	100	100	100	100
2			97.2222
4	92.3913
6	83.6957
8	77.1739	98.6111
10	63.0435		86.1111
12	50		81.9444
14	38.0435	97.2222	51.3889	99
16	29.3478		29.1667
18	18.4783		19.4444	98
20	14.1304	94.4444	16.6667
22	2.17391	81.9444	4.16667	94
24		73.6111
26	0	70.8333	0	93
28		50		85
30		47.2222		84
32		29.1667		63
34		27.7778
36		25		61
38		20.8333		52
40		13.8889		26
44		6.94444		16
46		5.55556		8
48		0		7
50				5
52				4
56				1
58				0

## Sheet: Survival_Fig 6E exp2
Days	AL+ETOH	AL+RU	DR+ETOH	DR+RU
0	100	100	100	100
2		96.3855		87.6712
4		78.3133		83.5616
6				72.6027
8		67.4699		65.7534
10		61.4458		60.274
12	98.9583	57.8313		50.6849
14		48.1928		47.9452
16		30.1205		45.2055
18	96.875	27.7108		41.0959
20		20.4819	96.7033	30.137
22	94.7917	16.8675		17.8082
24	87.5	13.253	91.2088	16.4384
26	86.4583	8.43373		1.36986
28	85.4167	4.81928	89.011	0
30	79.1667	0	84.6154
32	78.125
34	71.875		82.4176
36	63.5417
38	58.3333
40	56.25
42	47.9167		72.5275
44	35.4167
46	28.125		63.7363
48	21.875
50	15.625		53.8462
52	14.5833
54	13.5417		49.4505
56	11.4583		42.8571
58			34.0659
60	9.375		31.8681
62			28.5714
64	6.25		26.3736
66	4.16667
68	1.04167
70	0		18.6813
74			14.2857
76			12.0879
78			2.1978
80			0

## Sheet: Survival_Fig6Fig supp1A exp1
Days	DR-	DR+	AL-	AL+
0	100	100	100	100
5			98.9691
7			98.4536
9	99.4318
12	98.8636			98.9418
14	98.2955	99.4652	97.4227	98.4127
16	97.1591	98.9305	95.8763	97.8836
19			91.7526	95.2381
21	96.5909		88.6598	93.1217
23		97.3262	80.9278	87.3016
26	94.3182	96.7914	71.134	79.3651
28	92.6136		60.8247	76.1905
30	91.4773		56.701	71.4286
33	90.9091	94.1176	46.9072	64.5503
35	90.3409	93.5829	40.7216	60.3175
37			34.0206	50.7937
40	89.7727	91.4439	26.2887	40.2116
42			22.1649	34.9206
44		89.3048	19.5876	25.9259
47	89.2045	88.7701	13.9175	22.7513
49	87.5	86.631	10.8247	19.5767
51	85.2273	85.0267	6.18557	13.7566
54	80.6818	72.7273	1.03093	6.34921
56	77.2727	67.9144	0.515464	3.1746
58	68.75	57.2193		1.5873
61	61.3636	47.0588	0	0.529101
63	53.9773	37.4332		0
65	43.75	27.2727
68	25	12.8342
70	18.1818	5.88235
72	10.2273	5.34759
75	3.40909	0
77	0

## Sheet: Survival_Fig 6 Fig supp 1A exp2
Days	DR-	DR+	AL-	AL+
0	100	100	100	100
2			98.9691
5	99.4624	99.4652	97.4227
7	98.9247			99.4845
9	98.3871			98.9691
12		97.861	96.9072
14			96.3918	97.4227
16			94.8454	92.7835
19	97.8495		86.0825	83.5052
21			73.7113	71.6495
23			50	58.7629
26		97.3262	24.7423	38.1443
28	97.3118		10.8247	23.1959
30	96.7742	96.7914	2.06186	3.60825
33			0	0.515464
36	96.2366	96.2567		0
38	94.6237	95.7219
40	93.0108	93.5829
42	92.4731	93.0481
44	90.3226	92.5134
47	89.2473	91.4439
49	88.172	88.7701
51	84.9462	86.0963
54	77.4194	81.8182
56	72.5806	75.9358
58	65.0538	62.5668
61	51.6129	40.107
63	42.4731	21.3904
65	31.7204	17.1123
68	14.5161	7.48663
70	8.60215	5.34759
72	6.98925	2.13904
75	1.6129	0
77	0

[truncated: 3 more sheets: Survival_Fig6 Fig supp 1B, Survival_Fig 6 Fig supp 1C ex1, Survival_Fig 6 Fig supp 1C exp2]
