# Supplementary material for: miR-125-chinmo pathway regulates dietary restriction-dependent enhancement of lifespan in Drosophila
Source: eLife. 2021 Jun 8;10:e62621. doi: 10.7554/eLife.62621 (PMC8233039; doi:10.7554/eLife.62621)
Supplement: Figure 7—figure supplement 3—source data 4. [file elife-62621-fig7-figsupp3-data4.xlsx]

## Sheet: Survival Fig7_Fig supplement7A
Days	AL+E	AL+RU	DR+E	DR+RU
0	100	100	100	100
2			98.1818	98.8889
4	97.2222	95.283
6	96.2963			96.6667
8		94.3396	97.2727
10	95.3704	91.5094
12		89.6226
14	93.5185	88.6792
16		87.7358	96.3636	94.4444
18	91.6667	83.9623	93.6364
20	88.8889	80.1887	89.0909
22	77.7778	75.4717	88.1818	93.3333
24	67.5926	65.0943
26	50.9259	47.1698	86.3636	90
28	41.6667	36.7925
30	22.2222	23.5849	82.7273
32	9.25926	16.9811
34	7.40741	7.54717	80.9091
36	0.925926	0	73.6364	80
38	0		70	74.4444
40			64.5455	67.7778
42			60.9091
44			57.2727	57.7778
46			51.8182	37.7778
48				33.3333
50			38.1818	28.8889
52				25.5556
54			23.6364	23.3333
56				22.2222
58			9.09091	21.1111
60			7.27273
62			3.63636	17.7778
66				11.1111
68			0.909091
70				8.88889
72			0	2.22222
76				0

## Sheet: Survival Fig7_Fig supplement 7B
Days	AL+ETOH	AL+RU	DR+ETOH	DR+RU
0	83	86	93	94
2	83	86
4	79		93	94
6	78	85		88
8		84	90	87
10	77	82
12		81	87	86
14		80	85
16		77	82	85
18	76		80
20	74	75	79	84
24	73	71	75
26		60		82
28	71	51	70	80
30	70	47		77
32	64	43
34	60	39	60	76
36	51	33		72
38	32	16	55	69
40	14		44	57
42	8		38	47
44	5	2	33	43
46			29	37
48	3		25	22
50			16	13
52			15	6
56			11
58			7	3
60			6
62			4	2
64			2

## Sheet: Survival Fig7_Fig supplement 7C
Days	AL-	AL+	DR-	DR+
0	100	100	100	100
4			98.9796
6	98.7179			97.6471
8	93.5897	92.381	97.9592
10		91.4286	96.9388
12	92.3077
14	89.7436		94.898	96.4706
16	85.8974	87.619	93.8776
18	83.3333	84.7619	92.8571
20	79.4872	77.1429	90.8163
22	71.7949	71.4286		91.7647
24	70.5128			87.0588
26	50	59.0476	87.7551	85.8824
28	35.8974	56.1905	84.6939	80
30	34.6154	50.4762	80.6122
32	24.359	35.2381	77.551	76.4706
34	21.7949		74.4898	69.4118
36	12.8205	27.619
38	10.2564	26.6667	65.3061	60
40	7.69231	23.8095	60.2041
42	5.12821	20.9524	58.1633	55.2941
44		14.2857	53.0612	50.5882
46	3.84615	10.4762	48.9796
48	1.28205	7.61905	46.9388	44.7059
50	0	4.7619	45.9184	43.5294
52		3.80952	40.8163	41.1765
54		0	39.7959
56				35.2941
58				34.1176
60				32.9412
62			38.7755	27.0588
64			34.6939
66				22.3529
72			17.3469	18.8235
76			10.2041	15.2941
80			6.12245
84			4.08163	7.05882
86				4.70588
90			0	0
