# Supplementary material for: miR-125-chinmo pathway regulates dietary restriction-dependent enhancement of lifespan in Drosophila
Source: eLife. 2021 Jun 8;10:e62621. doi: 10.7554/eLife.62621 (PMC8233039; doi:10.7554/eLife.62621)
Supplement: Figure 7—source data 4. [file elife-62621-fig7-data4.xlsx]

## Sheet: Survival_Figure 7I exp 1
Days	AL+E	AL+RU	DR+E	DR+RU
0	100	100	100	100
2	96.2766			99.2126
4				94.4882
6	93.617
8		98.374		92.126
10	92.5532	96.748	93.3824	90.5512
12			92.6471	87.4016
14	90.4255	95.935		85.8268
16	89.8936	95.122		83.4646
18	85.1064	93.4959	91.9118	81.1024
20		85.3659		80.315
22	84.0426	75.6098	88.2353	79.5276
24	77.6596	72.3577	86.0294	76.378
26	71.8085	53.6585	81.6176
28	62.234	52.0325	79.4118	71.6535
30	53.7234	34.1463	75	66.9291
32	47.3404	28.4553		62.9921
34	32.4468	16.2602	68.3824	62.2047
36		13.8211		61.4173
38	19.6809	4.87805	56.6176	51.9685
40	19.1489	1.62602	53.6765	44.8819
42	9.04255		46.3235	42.5197
44	6.91489	0	40.4412
46	3.7234		36.0294	39.3701
48			35.2941	31.4961
50	2.65957		30.1471
52	2.12766		27.9412	19.685
54	0		22.0588	18.1102
56			19.8529	15.748
58			17.6471
60				13.3858
62			16.9118	12.5984
64				11.811
66			14.7059	11.0236
68				7.87402
70			13.2353	6.29921
74				4.72441
80			11.7647
82			10.2941	3.14961
86				0
88			7.35294
98			0

## Sheet: Survival_Figure 7I exp 2
Days	AL+E	AL+RU	DR+E	DR+RU
0	100	100	100	100
2	97.5806
4	93.5484	99.0566	99	99.0909
6				98.1818
8	91.129	92.4528	98
10	89.5161	90.566	97	96.3636
12	88.7097	87.7358	96
14	85.4839
16	82.2581	80.1887
18	79.8387	74.5283	95
20	71.7742	63.2075
22	68.5484	57.5472		94.5455
24		53.7736	92
26	58.871	45.283	86
28		38.6792		90.9091
30	53.2258	30.1887	84	88.1818
32	49.1935	16.9811
34	34.6774	15.0943		83.6364
36		13.2075		82.7273
38	16.129	5.66038		80.9091
40	14.5161		82	79.0909
42		0.943396		75.4545
44		0	79	74.5455
46	8.87097		76	73.6364
48			67	70
50	8.06452		65	69.0909
52			58	65.4545
54	4.83871			59.0909
56			55	58.1818
58	4.03226			50.9091
60			54	41.8182
62	0		49	40.9091
64			47	33.6364
66			40
68				26.3636
70			38
72			32	23.6364
74			29	22.7273
76			27	17.2727
78			25	13.6364
80			21	8.18182
82			20	5.45455
84			10	3.63636
86				0
88			7
90			6
96			4
98			3
100			2
104			0

## Sheet: Survival_Figure 7_Fig supp 3A 
Days	AL+E	AL+RU	DR+E	DR+RU
0	100	100	100	100
2			98.1818	98.8889
4	97.2222	95.283
6	96.2963			96.6667
8		94.3396	97.2727
10	95.3704	91.5094
12		89.6226
14	93.5185	88.6792
16		87.7358	96.3636	94.4444
18	91.6667	83.9623	93.6364
20	88.8889	80.1887	89.0909
22	77.7778	75.4717	88.1818	93.3333
24	67.5926	65.0943
26	50.9259	47.1698	86.3636	90
28	41.6667	36.7925
30	22.2222	23.5849	82.7273
32	9.25926	16.9811
34	7.40741	7.54717	80.9091
36	0.925926	0	73.6364	80
38	0		70	74.4444
40			64.5455	67.7778
42			60.9091
44			57.2727	57.7778
46			51.8182	37.7778
48				33.3333
50			38.1818	28.8889
52				25.5556
54			23.6364	23.3333
56				22.2222
58			9.09091	21.1111
60			7.27273
62			3.63636	17.7778
66				11.1111
68			0.909091
70				8.88889
72			0	2.22222
76				0

## Sheet: Survival_Figure 7J exp 1
Days	AL+ETOH	AL+RU	DR+E	DR+RU
0	123	113	97	124
4	123		97
6	122
10	120		96	124
12	119		95	123
14				119
16	116	113
18			94	117
20	110	110		112
22	106	107
24	103		90	109
26	96	105
28	87	102	86	103
30	81	94		97
32	75	83	81	94
34	72	75	74	92
36	59	67	72	88
38	55	56	68	78
40	40	44	64	76
42	35	35	61	59
44	28	30	58	54
46		22	49	46
48	21	18	44	44
50	18	14		40
52	17	10	36	36
54	11	7	34	27
56	9	3		26
58		1	31	20
60	8		28	12
62	6
64				8
66			27
70			26	2
72			24
74				1
76			21
78			17
80			15
82			12
86			10
88			6
90			5
94			1

## Sheet: Survival_Fig 7J exp 2
Days	AL+E	AL+RU	DR+E	DR+RU
0	100	100	100	100
12	98.8235	99.2424
16	94.1176	98.4848		98
18	91.7647		96.2025
20		87.8788		94
22	88.2353	79.5455		89
24	83.5294	74.2424	92.4051	87
26	78.8235	72.7273		79
28	71.7647	68.9394	89.8734	78
30	65.8824	61.3636
32	57.6471	58.3333		72
34	52.9412	51.5152
36	49.4118	38.6364	82.2785	69
38	37.6471	30.303	78.481	65
40	35.2941	21.9697		59
42	27.0588	12.8788	74.6835	57
44	18.8235	7.57576	65.8228	53
46	15.2941	6.81818		47
48	5.88235	4.54545	63.2911	43
50	4.70588	3.78788	60.7595	40
52		1.51515	51.8987	37
54	1.17647		45.5696	28
56				26
58	0	0	40.5063	24
60			35.443	16
62				15
64			29.1139	11
66			25.3165	6
68				5
70			20.2532
72			16.4557
74				4
80			15.1899	3
82			12.6582
84			6.32911	1
86			3.79747	0
90			2.53165
96			0

## Sheet: Survival_Figure7_Fig supp 3B
Days	AL+ETOH	AL+RU	DR+ETOH	DR+RU
0	100	100	100	100
2	95.1807	98.8372
4	93.9759		96.7742	93.617
6	92.7711	97.6744		92.5532
8		95.3488	93.5484	91.4894
10	91.5663	94.186
12		93.0233	91.3978	90.4255
14		89.5349	88.172
16		87.2093	86.0215	89.3617
18	89.1566		84.9462
20	87.9518	82.5581	80.6452	87.234
24	85.5422	69.7674	75.2688
26		59.3023		85.1064
28	84.3373	54.6512	64.5161	81.9149
30	77.1084	50		80.8511
32	72.2892	45.3488
34	61.4458	38.3721	59.1398	76.5957
36	38.5542	18.6047		73.4043
38	16.8675	2.32558	47.3118	60.6383
40	9.63855		40.8602	50
42	6.0241		35.4839	45.7447
44	3.61446	0	31.1828	39.3617
46			26.8817	23.4043
48	0		17.2043	13.8298
50			16.129	6.38298
52			11.828	3.19149
56			7.52688
58			6.45161	2.12766
60			4.30108
62			2.15054	0
64			0

## Sheet: Survival_Figure 7K Exp1
Days	AL+E	AL+RU	DR+E	DR+RU
0	100	100	100	100
2	95.302	98.2659
4	91.9463	95.3757
6	87.9195	94.7977	98.8571	99.4565
8			94.8571
10	85.2349		93.7143
12	84.5638		89.1429	98.3696
14	83.2215	93.0636		97.8261
16	79.8658	89.0173	84.5714	97.2826
18	69.1275	86.1272	84
20	66.443	84.9711	82.2857	94.0217
22	65.1007	80.3468	79.4286
24	59.0604	70.5202	78.2857	92.9348
26	48.9933	64.1618	68	92.3913
28	41.6107	56.0694		90.7609
30	30.8725	52.6012	45.1429	86.9565
32	16.7785	48.5549	37.7143	85.3261
34	12.7517	32.3699	32	83.6957
36	8.05369	30.6358	29.1429	72.2826
38	4.69799	20.2312	27.4286	68.4783
40	0.671141	11.5607	26.2857	56.5217
42	0	10.4046	16.5714	52.1739
44		1.15607	13.7143	47.2826
46			7.42857	33.6957
48			4.57143	28.8043
50		0	4	24.4565
52			1.14286	10.3261
54			0.571429	8.15217
56				7.6087
58				5.43478
60			0	3.26087
64				2.71739
66				1.63043
70				0

## Sheet: Survival_Fig 7K Exp2
Days	AL+E	AL+RU	DR+E	DR+RU
0	100	100	100	100
2	99.1667		99.1228
4	98.3333		98.2456	98.3333
6		95.7627
8	97.5	90.678	97.3684
10	95	89.8305
12	89.1667	85.5932
14	83.3333		96.4912
16	78.3333	80.5085		96.6667
18	61.6667		94.7368	95.8333
20	60.8333	72.0339
22	55	70.339	93.8596
24	44.1667	66.1017	92.9825
26	39.1667	56.7797	89.4737
28	26.6667	47.4576	88.5965	95
30	13.3333	39.8305
32	10.8333	38.1356	86.8421	94.1667
34	0.833333	33.8983	82.4561	92.5
36	0	27.1186	78.9474
38		20.339	75.4386
40		16.1017	71.0526	91.6667
42				85.8333
44		14.4068	57.0175	85
46		8.47458	55.2632	78.3333
48		5.08475	46.4912	76.6667
50		2.54237	43.8596	75.8333
52		1.69492	28.9474	69.1667
54			28.0702	68.3333
56		0	21.0526	62.5
58			18.4211
60			14.0351	55.8333
62			12.2807	53.3333
64			7.89474	50
66			6.14035	48.3333
68			3.50877	45.8333
70			1.75439
72				40.8333
76			0	35.8333
80				27.5
84				14.1667
88				11.6667
90				8.33333
94				5.83333
96				0.833333
102				0

## Sheet: Survival_Fig7_Fig supp3C
Days	AL-	AL+	DR-	DR+
0	100	100	100	100
4			98.9796
6	98.7179			97.6471
8	93.5897	92.381	97.9592
10		91.4286	96.9388
12	92.3077
14	89.7436		94.898	96.4706
16	85.8974	87.619	93.8776
18	83.3333	84.7619	92.8571
20	79.4872	77.1429	90.8163
22	71.7949	71.4286		91.7647
24	70.5128			87.0588
26	50	59.0476	87.7551	85.8824
28	35.8974	56.1905	84.6939	80
30	34.6154	50.4762	80.6122
32	24.359	35.2381	77.551	76.4706
34	21.7949		74.4898	69.4118
36	12.8205	27.619
38	10.2564	26.6667	65.3061	60
40	7.69231	23.8095	60.2041
42	5.12821	20.9524	58.1633	55.2941
44		14.2857	53.0612	50.5882
46	3.84615	10.4762	48.9796
48	1.28205	7.61905	46.9388	44.7059
50	0	4.7619	45.9184	43.5294
52		3.80952	40.8163	41.1765
54		0	39.7959
56				35.2941
58				34.1176
60				32.9412
62			38.7755	27.0588
64			34.6939
66				22.3529
72			17.3469	18.8235
76			10.2041	15.2941
80			6.12245
84			4.08163	7.05882
86				4.70588
90			0	0
