# Supplementary material for: miR-125-chinmo pathway regulates dietary restriction-dependent enhancement of lifespan in Drosophila
Source: eLife. 2021 Jun 8;10:e62621. doi: 10.7554/eLife.62621 (PMC8233039; doi:10.7554/eLife.62621)
Supplement: Figure 7—source data 5. [file elife-62621-fig7-data5.xlsx]

## Sheet: Upregulated_Biological Process
#term ID	term description	observed gene count	background gene count	false discovery rate	matching proteins in your network (IDs)	matching proteins in your network (labels)
GO:0002181	cytoplasmic translation	12	109	2.72e-05	FBpp0070150,FBpp0071050,FBpp0071846,FBpp0075700,FBpp0076207,FBpp0078354,FBpp0078416,FBpp0079328,FBpp0083371,FBpp0086269,FBpp0087608,FBpp0303780	RpL13A,RpL27,RpL31,RpL35A,RpL36,RpS13,RpS14a,RpS15,RpS17,RpS20,RpS24,eIF-2beta
GO:0044281	small molecule metabolic process	32	832	2.72e-05	FBpp0070083,FBpp0071551,FBpp0075755,FBpp0076647,FBpp0076771,FBpp0076826,FBpp0076937,FBpp0077209,FBpp0077251,FBpp0077355,FBpp0078358,FBpp0078759,FBpp0079109,FBpp0080051,FBpp0080475,FBpp0081438,FBpp0081807,FBpp0082095,FBpp0082816,FBpp0082895,FBpp0083745,FBpp0083935,FBpp0085117,FBpp0085630,FBpp0086158,FBpp0086370,FBpp0086691,FBpp0087272,FBpp0087999,FBpp0304781,FBpp0305104,FBpp0305117	Aats-asp,AdSL,Adk3,CAHbeta,CG10467,CG11208,CG12170,CG1544,CG17224,CG30493,CG31739,CG33123,CG4302,CG4598,CG6178,CG6733,CG7277,Cbs,Desat1,Got1,ND-B22,ND-PDSW,ND-SGDH,P5cr-2,Ppat-Dpck,SelD,Sply,Uro,arg,dare,l(1)G0230,sgl
GO:0008152	metabolic process	94	4926	0.00022	FBpp0070083,FBpp0070150,FBpp0070729,FBpp0071050,FBpp0071551,FBpp0071846,FBpp0072385,FBpp0072761,FBpp0073081,FBpp0073354,FBpp0073551,FBpp0074278,FBpp0074425,FBpp0074519,FBpp0075068,FBpp0075107,FBpp0075156,FBpp0075700,FBpp0075755,FBpp0076207,FBpp0076608,FBpp0076647,FBpp0076749,FBpp0076771,FBpp0076826,FBpp0076859,FBpp0076937,FBpp0077143,FBpp0077209,FBpp0077251,FBpp0077355,FBpp0077740,FBpp0077962,FBp…	ALiX,Aats-asp,AdSL,Adk3,ApepP,Art4,Atg18a,CAHbeta,CG10467,CG11208,CG12170,CG14997,CG1544,CG17224,CG17323,CG1749,CG1814,CG30493,CG31198,CG31373,CG31673,CG31739,CG33123,CG4302,CG4598,CG6178,CG6523,CG6733,CG7277,CG7322,CG8728,CG9953,CSN4,Cbs,Coprox,Cyp12a4,Cyp6a20,Cyp6a23,Dbp80,Desat1,Got1,Gs1l,Hel25E,Hmu,Idgf1,Ilk,Jon65Aiii,Mal-B2,Mcm3,Mipp1,ND-B22,ND-PDSW,ND-SGDH,NitFhit,P5cr-2,PGRP-SB1,PpD3,Ppat-…
GO:1901564	organonitrogen compound metabolic process	64	2860	0.00026	FBpp0070083,FBpp0070150,FBpp0071050,FBpp0071846,FBpp0073354,FBpp0073551,FBpp0074278,FBpp0074519,FBpp0075068,FBpp0075107,FBpp0075700,FBpp0075755,FBpp0076207,FBpp0076608,FBpp0076647,FBpp0076749,FBpp0076826,FBpp0076859,FBpp0076937,FBpp0077209,FBpp0077251,FBpp0077355,FBpp0077740,FBpp0077962,FBpp0078354,FBpp0078416,FBpp0078980,FBpp0079109,FBpp0079328,FBpp0079462,FBpp0080051,FBpp0080417,FBpp0080475,FBp…	ALiX,Aats-asp,AdSL,Adk3,ApepP,Art4,Atg18a,CG17224,CG1749,CG31198,CG31373,CG31739,CG33123,CG6178,CG6733,CG8728,CG9953,CSN4,Cbs,Coprox,Got1,Idgf1,Ilk,Jon65Aiii,ND-B22,ND-PDSW,ND-SGDH,P5cr-2,PGRP-SB1,PpD3,Ppat-Dpck,Prp19,Ras85D,RpL13A,RpL27,RpL31,RpL35A,RpL36,RpS13,RpS14a,RpS15,RpS17,RpS20,RpS24,Rpn12,SelD,Sply,Spp,Ubc10,Ubqn,Uev1A,Uro,Vps4,alien,arg,calypso,eIF-2beta,l(1)G0230,lic,p47,primo-1,ref(2…
GO:1901566	organonitrogen compound biosynthetic process	28	788	0.00026	FBpp0070150,FBpp0071050,FBpp0071846,FBpp0075700,FBpp0076207,FBpp0076647,FBpp0076826,FBpp0076937,FBpp0077251,FBpp0078354,FBpp0078416,FBpp0078980,FBpp0079109,FBpp0079328,FBpp0080475,FBpp0081807,FBpp0082816,FBpp0082895,FBpp0083371,FBpp0083935,FBpp0086269,FBpp0086370,FBpp0086691,FBpp0087608,FBpp0302863,FBpp0303780,FBpp0305104,FBpp0305117	Aats-asp,AdSL,Adk3,Atg18a,CG31739,CG33123,CG6178,Cbs,Coprox,Got1,P5cr-2,Ppat-Dpck,RpL13A,RpL27,RpL31,RpL35A,RpL36,RpS13,RpS14a,RpS15,RpS17,RpS20,RpS24,SelD,Uro,eIF-2beta,l(1)G0230,sgl
GO:0043604	amide biosynthetic process	17	336	0.00043	FBpp0070150,FBpp0071050,FBpp0071846,FBpp0075700,FBpp0076207,FBpp0077251,FBpp0078354,FBpp0078416,FBpp0079109,FBpp0079328,FBpp0080475,FBpp0083371,FBpp0083935,FBpp0086269,FBpp0087608,FBpp0303780,FBpp0305104	Aats-asp,CG31739,CG33123,CG6178,RpL13A,RpL27,RpL31,RpL35A,RpL36,RpS13,RpS14a,RpS15,RpS17,RpS20,RpS24,Uro,eIF-2beta
GO:0044237	cellular metabolic process	79	3966	0.00043	FBpp0070083,FBpp0070150,FBpp0070729,FBpp0071050,FBpp0071551,FBpp0071846,FBpp0072385,FBpp0072761,FBpp0073354,FBpp0073551,FBpp0074278,FBpp0075068,FBpp0075156,FBpp0075700,FBpp0075755,FBpp0076207,FBpp0076647,FBpp0076826,FBpp0076859,FBpp0076937,FBpp0077143,FBpp0077209,FBpp0077251,FBpp0077355,FBpp0077740,FBpp0077962,FBpp0078354,FBpp0078358,FBpp0078416,FBpp0078754,FBpp0078759,FBpp0078980,FBpp0079109,FBp…	ALiX,Aats-asp,AdSL,Adk3,Art4,Atg18a,CAHbeta,CG11208,CG12170,CG1544,CG17224,CG1749,CG1814,CG30493,CG31198,CG31373,CG31739,CG33123,CG4302,CG4598,CG6178,CG6523,CG6733,CG7277,CG8728,CSN4,Cbs,Coprox,Dbp80,Desat1,Got1,Gs1l,Hel25E,Idgf1,Ilk,Mal-B2,Mcm3,Mipp1,ND-B22,ND-PDSW,ND-SGDH,NitFhit,P5cr-2,PpD3,Ppat-Dpck,Prp19,Ras85D,RpL13A,RpL27,RpL31,RpL35A,RpL36,RpS13,RpS14a,RpS15,RpS17,RpS20,RpS24,Rpn12,SelD,S…
GO:0044249	cellular biosynthetic process	37	1350	0.00089	FBpp0070150,FBpp0070729,FBpp0071050,FBpp0071846,FBpp0072761,FBpp0075700,FBpp0076207,FBpp0076647,FBpp0076826,FBpp0076937,FBpp0077251,FBpp0077355,FBpp0078354,FBpp0078358,FBpp0078416,FBpp0078759,FBpp0078980,FBpp0079109,FBpp0079328,FBpp0080260,FBpp0080475,FBpp0081807,FBpp0082095,FBpp0082816,FBpp0082895,FBpp0083371,FBpp0083935,FBpp0086269,FBpp0086370,FBpp0086691,FBpp0087272,FBpp0087608,FBpp0087999,FBp…	Aats-asp,AdSL,Adk3,Atg18a,CG12170,CG17224,CG30493,CG31739,CG33123,CG6178,CG7277,Cbs,Coprox,Desat1,Got1,Mcm3,P5cr-2,Ppat-Dpck,RpL13A,RpL27,RpL31,RpL35A,RpL36,RpS13,RpS14a,RpS15,RpS17,RpS20,RpS24,SelD,Uro,dare,eIF-2beta,l(1)G0230,sgl,yellow-c,yellow-g2
GO:0009058	biosynthetic process	38	1424	0.001	FBpp0070150,FBpp0070729,FBpp0071050,FBpp0071846,FBpp0072761,FBpp0075700,FBpp0076207,FBpp0076647,FBpp0076826,FBpp0076937,FBpp0077251,FBpp0077355,FBpp0078354,FBpp0078358,FBpp0078416,FBpp0078759,FBpp0078980,FBpp0079109,FBpp0079328,FBpp0080260,FBpp0080475,FBpp0081807,FBpp0082095,FBpp0082816,FBpp0082895,FBpp0083371,FBpp0083935,FBpp0084534,FBpp0086269,FBpp0086370,FBpp0086691,FBpp0087272,FBpp0087608,FBp…	Aats-asp,AdSL,Adk3,Atg18a,CG12170,CG17224,CG30493,CG31739,CG33123,CG6178,CG7277,Cbs,Coprox,Desat1,Got1,Hmu,Mcm3,P5cr-2,Ppat-Dpck,RpL13A,RpL27,RpL31,RpL35A,RpL36,RpS13,RpS14a,RpS15,RpS17,RpS20,RpS24,SelD,Uro,dare,eIF-2beta,l(1)G0230,sgl,yellow-c,yellow-g2
GO:0043436	oxoacid metabolic process	17	373	0.001	FBpp0070083,FBpp0076647,FBpp0076937,FBpp0077251,FBpp0078358,FBpp0080475,FBpp0082095,FBpp0082895,FBpp0083745,FBpp0083935,FBpp0085117,FBpp0085630,FBpp0086158,FBpp0086370,FBpp0086691,FBpp0304781,FBpp0305104	Aats-asp,CG11208,CG12170,CG1544,CG31739,CG33123,CG4598,CG6178,CG6733,Cbs,Desat1,Got1,P5cr-2,SelD,Sply,arg,sgl
GO:0006412	translation	15	304	0.0011	FBpp0070150,FBpp0071050,FBpp0071846,FBpp0075700,FBpp0076207,FBpp0077251,FBpp0078354,FBpp0078416,FBpp0079328,FBpp0080475,FBpp0083371,FBpp0086269,FBpp0087608,FBpp0303780,FBpp0305104	Aats-asp,CG31739,CG33123,RpL13A,RpL27,RpL31,RpL35A,RpL36,RpS13,RpS14a,RpS15,RpS17,RpS20,RpS24,eIF-2beta
GO:0043603	cellular amide metabolic process	19	467	0.0011	FBpp0070150,FBpp0071050,FBpp0071846,FBpp0075700,FBpp0076207,FBpp0077251,FBpp0077740,FBpp0078354,FBpp0078416,FBpp0079109,FBpp0079328,FBpp0080475,FBpp0083371,FBpp0083526,FBpp0083935,FBpp0086269,FBpp0087608,FBpp0303780,FBpp0305104	Aats-asp,CG31198,CG31739,CG33123,CG6178,RpL13A,RpL27,RpL31,RpL35A,RpL36,RpS13,RpS14a,RpS15,RpS17,RpS20,RpS24,Spp,Uro,eIF-2beta
GO:1901576	organic substance biosynthetic process	37	1397	0.0011	FBpp0070150,FBpp0070729,FBpp0071050,FBpp0071846,FBpp0072761,FBpp0075700,FBpp0076207,FBpp0076647,FBpp0076826,FBpp0076937,FBpp0077251,FBpp0077355,FBpp0078354,FBpp0078358,FBpp0078416,FBpp0078759,FBpp0078980,FBpp0079109,FBpp0079328,FBpp0080260,FBpp0080475,FBpp0081807,FBpp0082095,FBpp0082816,FBpp0082895,FBpp0083371,FBpp0083935,FBpp0086269,FBpp0086370,FBpp0086691,FBpp0087272,FBpp0087608,FBpp0087999,FBp…	Aats-asp,AdSL,Adk3,Atg18a,CG12170,CG17224,CG30493,CG31739,CG33123,CG6178,CG7277,Cbs,Coprox,Desat1,Got1,Mcm3,P5cr-2,Ppat-Dpck,RpL13A,RpL27,RpL31,RpL35A,RpL36,RpS13,RpS14a,RpS15,RpS17,RpS20,RpS24,SelD,Uro,dare,eIF-2beta,l(1)G0230,sgl,yellow-c,yellow-g2
GO:0006518	peptide metabolic process	17	393	0.0012	FBpp0070150,FBpp0071050,FBpp0071846,FBpp0075700,FBpp0076207,FBpp0077251,FBpp0077740,FBpp0078354,FBpp0078416,FBpp0079328,FBpp0080475,FBpp0083371,FBpp0083526,FBpp0086269,FBpp0087608,FBpp0303780,FBpp0305104	Aats-asp,CG31198,CG31739,CG33123,RpL13A,RpL27,RpL31,RpL35A,RpL36,RpS13,RpS14a,RpS15,RpS17,RpS20,RpS24,Spp,eIF-2beta
GO:0019752	carboxylic acid metabolic process	16	358	0.0014	FBpp0070083,FBpp0076937,FBpp0077251,FBpp0078358,FBpp0080475,FBpp0082095,FBpp0082895,FBpp0083745,FBpp0083935,FBpp0085117,FBpp0085630,FBpp0086158,FBpp0086370,FBpp0086691,FBpp0304781,FBpp0305104	Aats-asp,CG11208,CG12170,CG1544,CG31739,CG33123,CG4598,CG6178,CG6733,Cbs,Desat1,Got1,P5cr-2,SelD,Sply,arg
GO:0071704	organic substance metabolic process	81	4432	0.0032	FBpp0070083,FBpp0070150,FBpp0070729,FBpp0071050,FBpp0071551,FBpp0071846,FBpp0072385,FBpp0072761,FBpp0073354,FBpp0073551,FBpp0074278,FBpp0074519,FBpp0075068,FBpp0075107,FBpp0075700,FBpp0075755,FBpp0076207,FBpp0076608,FBpp0076647,FBpp0076749,FBpp0076771,FBpp0076826,FBpp0076859,FBpp0076937,FBpp0077209,FBpp0077251,FBpp0077355,FBpp0077740,FBpp0077962,FBpp0078354,FBpp0078358,FBpp0078416,FBpp0078754,FBp…	ALiX,Aats-asp,AdSL,Adk3,ApepP,Art4,Atg18a,CG10467,CG11208,CG12170,CG1544,CG17224,CG1749,CG30493,CG31198,CG31373,CG31739,CG33123,CG4302,CG4598,CG6178,CG6733,CG7277,CG8728,CG9953,CSN4,Cbs,Coprox,Dbp80,Desat1,Got1,Hel25E,Idgf1,Ilk,Jon65Aiii,Mal-B2,Mcm3,ND-B22,ND-PDSW,ND-SGDH,NitFhit,P5cr-2,PGRP-SB1,PpD3,Ppat-Dpck,Prp19,Ras85D,RpL13A,RpL27,RpL31,RpL35A,RpL36,RpS13,RpS14a,RpS15,RpS17,RpS20,RpS24,Rpn12…
GO:0033036	macromolecule localization	23	738	0.0048	FBpp0073297,FBpp0074348,FBpp0074609,FBpp0076558,FBpp0077206,FBpp0077625,FBpp0077812,FBpp0077962,FBpp0078754,FBpp0078761,FBpp0078896,FBpp0079943,FBpp0081584,FBpp0081597,FBpp0081600,FBpp0082643,FBpp0084133,FBpp0085380,FBpp0087958,FBpp0290878,FBpp0297159,FBpp0301765,FBpp0302863	Atg18a,CG3164,CG7382,CG8728,Dap160,Dlic,Gp210,Hel25E,Ilk,Kap-alpha3,Rab6,Ras85D,Sec61alpha,Sec63,Snx1,Vps29,alphaSnap,bai,betaCOP,by,cv-d,veli,vib
GO:0044238	primary metabolic process	75	4093	0.0068	FBpp0070083,FBpp0070150,FBpp0070729,FBpp0071050,FBpp0071551,FBpp0071846,FBpp0072385,FBpp0073354,FBpp0073551,FBpp0074278,FBpp0074519,FBpp0075068,FBpp0075700,FBpp0075755,FBpp0076207,FBpp0076608,FBpp0076647,FBpp0076749,FBpp0076771,FBpp0076826,FBpp0076859,FBpp0076937,FBpp0077209,FBpp0077251,FBpp0077355,FBpp0077740,FBpp0077962,FBpp0078354,FBpp0078358,FBpp0078416,FBpp0078754,FBpp0079109,FBpp0079328,FBp…	ALiX,Aats-asp,AdSL,Adk3,ApepP,Art4,Atg18a,CG10467,CG11208,CG12170,CG1544,CG17224,CG1749,CG31198,CG31373,CG31739,CG33123,CG4302,CG4598,CG6178,CG6733,CG8728,CG9953,CSN4,Cbs,Dbp80,Desat1,Got1,Hel25E,Idgf1,Ilk,Jon65Aiii,Mal-B2,Mcm3,ND-B22,ND-PDSW,ND-SGDH,NitFhit,P5cr-2,PpD3,Ppat-Dpck,Prp19,Ras85D,RpL13A,RpL27,RpL31,RpL35A,RpL36,RpS13,RpS14a,RpS15,RpS17,RpS20,RpS24,Rpn12,SelD,Sply,Spp,Ubc10,Ubqn,Uev1A…
GO:0006520	cellular amino acid metabolic process	9	151	0.0115	FBpp0070083,FBpp0076937,FBpp0077251,FBpp0080475,FBpp0082895,FBpp0083745,FBpp0086370,FBpp0086691,FBpp0305104	Aats-asp,CG31739,CG33123,CG6733,Cbs,Got1,P5cr-2,SelD,arg
GO:0055114	oxidation-reduction process	21	690	0.0121	FBpp0073081,FBpp0074425,FBpp0075755,FBpp0076647,FBpp0077209,FBpp0078759,FBpp0078980,FBpp0079109,FBpp0080044,FBpp0080051,FBpp0080951,FBpp0082095,FBpp0082895,FBpp0083145,FBpp0085117,FBpp0085630,FBpp0086582,FBpp0087272,FBpp0289404,FBpp0302863,FBpp0304781	Atg18a,CG11208,CG14997,CG1544,CG31673,CG4598,CG6523,CG7277,CG7322,Coprox,Cyp12a4,Cyp6a20,Cyp6a23,Desat1,ND-B22,ND-PDSW,ND-SGDH,P5cr-2,Uro,dare,sgl
GO:0006890	retrograde vesicle-mediated transport, Golgi to endoplasmic reticulum	4	20	0.0125	FBpp0074348,FBpp0078891,FBpp0079943,FBpp0271764	CG11857,Rab6,betaCOP,epsilonCOP
GO:0044283	small molecule biosynthetic process	11	231	0.0128	FBpp0076937,FBpp0077355,FBpp0078358,FBpp0078759,FBpp0082095,FBpp0082895,FBpp0083935,FBpp0086370,FBpp0086691,FBpp0087272,FBpp0087999	CG12170,CG17224,CG30493,CG6178,CG7277,Cbs,Desat1,Got1,P5cr-2,SelD,dare
GO:0031589	cell-substrate adhesion	4	21	0.0136	FBpp0073066,FBpp0076111,FBpp0077962,FBpp0087439	Fit1,Ilk,LanB2,Ndg
GO:0044267	cellular protein metabolic process	37	1644	0.017	FBpp0070150,FBpp0071050,FBpp0071846,FBpp0073354,FBpp0073551,FBpp0074278,FBpp0075068,FBpp0075700,FBpp0076207,FBpp0076859,FBpp0077251,FBpp0077740,FBpp0077962,FBpp0078354,FBpp0078416,FBpp0079328,FBpp0080475,FBpp0080794,FBpp0081600,FBpp0081606,FBpp0081794,FBpp0083371,FBpp0084610,FBpp0085902,FBpp0086269,FBpp0086383,FBpp0087608,FBpp0087935,FBpp0087958,FBpp0088069,FBpp0088522,FBpp0099893,FBpp0302863,FBp…	ALiX,Aats-asp,Art4,Atg18a,CG1749,CG31373,CG31739,CG33123,CG8728,CSN4,Ilk,PpD3,Prp19,Ras85D,RpL13A,RpL27,RpL31,RpL35A,RpL36,RpS13,RpS14a,RpS15,RpS17,RpS20,RpS24,Rpn12,Spp,Ubc10,Uev1A,Vps4,alien,calypso,eIF-2beta,lic,p47,primo-1,ref(2)P
GO:0006891	intra-Golgi vesicle-mediated transport	4	23	0.0172	FBpp0074348,FBpp0074609,FBpp0078891,FBpp0079943	Rab6,alphaSnap,betaCOP,epsilonCOP
GO:0008104	protein localization	18	580	0.0226	FBpp0074348,FBpp0074609,FBpp0076558,FBpp0077206,FBpp0077625,FBpp0077962,FBpp0078754,FBpp0078761,FBpp0078896,FBpp0081584,FBpp0081597,FBpp0081600,FBpp0084133,FBpp0085380,FBpp0087958,FBpp0290878,FBpp0297159,FBpp0302863	Atg18a,CG7382,CG8728,Dap160,Gp210,Hel25E,Ilk,Kap-alpha3,Ras85D,Sec61alpha,Sec63,Snx1,Vps29,alphaSnap,bai,betaCOP,by,veli
GO:0009987	cellular process	108	6847	0.0226	FBpp0070083,FBpp0070150,FBpp0070249,FBpp0070729,FBpp0071050,FBpp0071551,FBpp0071846,FBpp0072177,FBpp0072385,FBpp0072761,FBpp0073066,FBpp0073297,FBpp0073354,FBpp0073551,FBpp0074278,FBpp0074348,FBpp0074609,FBpp0074717,FBpp0075068,FBpp0075156,FBpp0075683,FBpp0075700,FBpp0075755,FBpp0076111,FBpp0076207,FBpp0076647,FBpp0076826,FBpp0076859,FBpp0076937,FBpp0077143,FBpp0077206,FBpp0077209,FBpp0077251,FBp…	ALiX,Aats-asp,AdSL,Adk3,Art4,Atg18a,CAHbeta,CG11208,CG12170,CG1544,CG17224,CG1749,CG17514,CG1814,CG30493,CG31198,CG31373,CG31739,CG33123,CG4164,CG4302,CG4598,CG5721,CG6178,CG6523,CG6733,CG7277,CG7382,CG8728,CSN4,Cbs,Coprox,Dap160,Dbp80,Desat1,Dlic,Fit1,Gbeta76C,Got1,Gp210,Gs1l,Hel25E,Idgf1,Ilk,Klc,LanB2,Lsp2,Mal-B2,Mcm3,Mipp1,ND-B22,ND-PDSW,ND-SGDH,NitFhit,P5cr-2,Pdcd4,PpD3,Ppat-Dpck,Prp19,Rab6,R…
GO:0006743	ubiquinone metabolic process	3	11	0.0298	FBpp0078759,FBpp0087272,FBpp0087999	CG30493,CG7277,dare
GO:0006744	ubiquinone biosynthetic process	3	11	0.0298	FBpp0078759,FBpp0087272,FBpp0087999	CG30493,CG7277,dare
GO:0006807	nitrogen compound metabolic process	69	3900	0.0298	FBpp0070083,FBpp0070150,FBpp0070729,FBpp0071050,FBpp0071551,FBpp0071846,FBpp0072385,FBpp0073354,FBpp0073551,FBpp0074278,FBpp0074519,FBpp0075068,FBpp0075107,FBpp0075700,FBpp0075755,FBpp0076207,FBpp0076608,FBpp0076647,FBpp0076749,FBpp0076826,FBpp0076859,FBpp0076937,FBpp0077209,FBpp0077251,FBpp0077355,FBpp0077740,FBpp0077962,FBpp0078354,FBpp0078416,FBpp0078754,FBpp0078980,FBpp0079109,FBpp0079328,FBp…	ALiX,Aats-asp,AdSL,Adk3,ApepP,Art4,Atg18a,CG17224,CG1749,CG31198,CG31373,CG31739,CG33123,CG4302,CG6178,CG6733,CG8728,CG9953,CSN4,Cbs,Coprox,Dbp80,Got1,Hel25E,Idgf1,Ilk,Jon65Aiii,Mcm3,ND-B22,ND-PDSW,ND-SGDH,NitFhit,P5cr-2,PGRP-SB1,PpD3,Ppat-Dpck,Prp19,Ras85D,RpL13A,RpL27,RpL31,RpL35A,RpL36,RpS13,RpS14a,RpS15,RpS17,RpS20,RpS24,Rpn12,SelD,Sply,Spp,Ubc10,Ubqn,Uev1A,Uro,Vps4,alien,arg,calypso,eIF-2bet…
GO:0009064	glutamine family amino acid metabolic process	4	28	0.0298	FBpp0070083,FBpp0082895,FBpp0086370,FBpp0086691	Got1,P5cr-2,SelD,arg
GO:0019538	protein metabolic process	44	2158	0.0298	FBpp0070150,FBpp0071050,FBpp0071846,FBpp0073354,FBpp0073551,FBpp0074278,FBpp0074519,FBpp0075068,FBpp0075700,FBpp0076207,FBpp0076608,FBpp0076647,FBpp0076749,FBpp0076859,FBpp0077251,FBpp0077740,FBpp0077962,FBpp0078354,FBpp0078416,FBpp0079328,FBpp0079462,FBpp0080475,FBpp0080509,FBpp0080794,FBpp0081600,FBpp0081606,FBpp0081794,FBpp0083371,FBpp0083526,FBpp0084610,FBpp0085902,FBpp0086269,FBpp0086383,FBp…	ALiX,Aats-asp,ApepP,Art4,Atg18a,CG1749,CG31198,CG31373,CG31739,CG33123,CG8728,CG9953,CSN4,Ilk,Jon65Aiii,PpD3,Prp19,Ras85D,RpL13A,RpL27,RpL31,RpL35A,RpL36,RpS13,RpS14a,RpS15,RpS17,RpS20,RpS24,Rpn12,Spp,Ubc10,Ubqn,Uev1A,Vps4,alien,calypso,eIF-2beta,lic,p47,primo-1,ref(2)P,sgl,und
GO:0034613	cellular protein localization	15	447	0.0298	FBpp0074348,FBpp0074609,FBpp0076558,FBpp0077206,FBpp0077625,FBpp0077962,FBpp0078754,FBpp0078761,FBpp0081584,FBpp0081597,FBpp0081600,FBpp0085380,FBpp0087958,FBpp0290878,FBpp0302863	Atg18a,CG7382,CG8728,Gp210,Hel25E,Ilk,Kap-alpha3,Ras85D,Sec63,Snx1,Vps29,alphaSnap,betaCOP,by,veli
GO:0044271	cellular nitrogen compound biosynthetic process	23	881	0.0298	FBpp0070150,FBpp0071050,FBpp0071846,FBpp0075700,FBpp0076207,FBpp0076826,FBpp0077251,FBpp0077355,FBpp0078354,FBpp0078416,FBpp0078980,FBpp0079109,FBpp0079328,FBpp0080475,FBpp0081807,FBpp0082816,FBpp0083371,FBpp0083935,FBpp0086269,FBpp0087608,FBpp0303780,FBpp0305104,FBpp0305117	Aats-asp,AdSL,Adk3,CG17224,CG31739,CG33123,CG6178,Coprox,Ppat-Dpck,RpL13A,RpL27,RpL31,RpL35A,RpL36,RpS13,RpS14a,RpS15,RpS17,RpS20,RpS24,Uro,eIF-2beta,l(1)G0230
GO:0070727	cellular macromolecule localization	16	502	0.0298	FBpp0074348,FBpp0074609,FBpp0076558,FBpp0077206,FBpp0077625,FBpp0077962,FBpp0078754,FBpp0078761,FBpp0079943,FBpp0081584,FBpp0081597,FBpp0081600,FBpp0085380,FBpp0087958,FBpp0290878,FBpp0302863	Atg18a,CG7382,CG8728,Gp210,Hel25E,Ilk,Kap-alpha3,Rab6,Ras85D,Sec63,Snx1,Vps29,alphaSnap,betaCOP,by,veli
GO:0006422	aspartyl-tRNA aminoacylation	2	2	0.0329	FBpp0080475,FBpp0305104	Aats-asp,CG31739
GO:0048193	Golgi vesicle transport	7	118	0.0329	FBpp0074348,FBpp0074609,FBpp0077206,FBpp0078891,FBpp0079943,FBpp0084133,FBpp0271764	CG11857,Rab6,Snx1,alphaSnap,bai,betaCOP,epsilonCOP
GO:1901607	alpha-amino acid biosynthetic process	4	34	0.0417	FBpp0076937,FBpp0082895,FBpp0086370,FBpp0086691	Cbs,Got1,P5cr-2,SelD
GO:0007160	cell-matrix adhesion	3	15	0.045	FBpp0073066,FBpp0077962,FBpp0087439	Fit1,Ilk,Ndg
GO:0015031	protein transport	13	388	0.0476	FBpp0074348,FBpp0074609,FBpp0076558,FBpp0077206,FBpp0077625,FBpp0078754,FBpp0078761,FBpp0078896,FBpp0081584,FBpp0081600,FBpp0084133,FBpp0085380,FBpp0087958	CG7382,CG8728,Gp210,Hel25E,Kap-alpha3,Ras85D,Sec61alpha,Sec63,Snx1,Vps29,alphaSnap,bai,betaCOP
