# Supplementary material for: miR-125-chinmo pathway regulates dietary restriction-dependent enhancement of lifespan in Drosophila
Source: eLife. 2021 Jun 8;10:e62621. doi: 10.7554/eLife.62621 (PMC8233039; doi:10.7554/eLife.62621)
Supplement: Figure 7—source data 6. [file elife-62621-fig7-data6.xlsx]

## Sheet: Downregulated Biological Proces
#term ID	term description	observed gene count	background gene count	false discovery rate	matching proteins in your network (IDs)	matching proteins in your network (labels)
GO:0008152	metabolic process	85	4926	0.00015	FBpp0070006,FBpp0070637,FBpp0070862,FBpp0070875,FBpp0070913,FBpp0070940,FBpp0071084,FBpp0071406,FBpp0072132,FBpp0072460,FBpp0072659,FBpp0072801,FBpp0072848,FBpp0073120,FBpp0073235,FBpp0073947,FBpp0074054,FBpp0074480,FBpp0075693,FBpp0075926,FBpp0076077,FBpp0076142,FBpp0076238,FBpp0076312,FBpp0077468,FBpp0077473,FBpp0078078,FBpp0078357,FBpp0078370,FBpp0078450,FBpp0078532,FBpp0078684,FBpp0078850,FBp…	Aats-cys,Aats-gln,Aats-trp,Acer,Ance,Arc42,CG10097,CG10602,CG10688,CG10777,CG11999,CG12171,CG12173,CG1236,CG17333,CG17544,CG17560,CG1774,CG2064,CG2107,CG2118,CG32444,CG3270,CG3609,CG4747,CG4847,CG5009,CG6415,CG8778,CG8891,CG9510,CG9527,CG9577,CG9769,CSN6,Cnx99A,Cyt-b5-r,DCP1,Fad2,Fatp,Galt,Gip,Idgf3,Irp-1B,Mal-A6,Mal-A7,Mcm5,Mcm6,Mcm7,Mtp,Nat1,Nsun2,Oscillin,Prosbeta1,Rab5,Reg-2,RfC38,RfC4,RpL17,…
GO:0019752	carboxylic acid metabolic process	18	358	0.00015	FBpp0070006,FBpp0070875,FBpp0071406,FBpp0072848,FBpp0079697,FBpp0080759,FBpp0081460,FBpp0082476,FBpp0084240,FBpp0086373,FBpp0086993,FBpp0088517,FBpp0088675,FBpp0113095,FBpp0289058,FBpp0289859,FBpp0289893,FBpp0300203	Aats-cys,Aats-gln,Aats-trp,CG12173,CG17544,CG2107,CG2118,CG5009,CG6415,CG8778,CG9510,CG9527,CG9577,Fatp,Gip,Spat,r,smp-30
GO:0044281	small molecule metabolic process	27	832	0.00015	FBpp0070006,FBpp0070875,FBpp0071406,FBpp0072848,FBpp0073235,FBpp0075693,FBpp0078078,FBpp0078684,FBpp0078850,FBpp0078951,FBpp0079697,FBpp0080759,FBpp0081460,FBpp0082476,FBpp0082780,FBpp0084240,FBpp0085159,FBpp0086373,FBpp0086993,FBpp0088517,FBpp0088675,FBpp0113095,FBpp0289058,FBpp0289859,FBpp0289893,FBpp0290556,FBpp0300203	Aats-cys,Aats-gln,Aats-trp,CG10688,CG12173,CG17333,CG17544,CG17560,CG1774,CG2107,CG2118,CG32444,CG5009,CG6415,CG8778,CG8891,CG9510,CG9527,CG9577,Fatp,Galt,Gip,Spat,ade2,bur,r,smp-30
GO:0072329	monocarboxylic acid catabolic process	7	41	0.00018	FBpp0070006,FBpp0070875,FBpp0072848,FBpp0080759,FBpp0086993,FBpp0088517,FBpp0113095	CG17544,CG2107,CG5009,CG8778,CG9527,CG9577,Spat
GO:0044282	small molecule catabolic process	10	115	0.00019	FBpp0070006,FBpp0070875,FBpp0072848,FBpp0078078,FBpp0078951,FBpp0079697,FBpp0080759,FBpp0086993,FBpp0088517,FBpp0113095	CG17544,CG2107,CG32444,CG5009,CG6415,CG8778,CG9527,CG9577,Galt,Spat
GO:0006635	fatty acid beta-oxidation	6	30	0.00039	FBpp0070006,FBpp0072848,FBpp0080759,FBpp0086993,FBpp0088517,FBpp0113095	CG17544,CG2107,CG5009,CG8778,CG9527,CG9577
GO:0044238	primary metabolic process	71	4093	0.00039	FBpp0070006,FBpp0070637,FBpp0070862,FBpp0070875,FBpp0070913,FBpp0070940,FBpp0071084,FBpp0072132,FBpp0072659,FBpp0072801,FBpp0072848,FBpp0073120,FBpp0073235,FBpp0073947,FBpp0074054,FBpp0074480,FBpp0075693,FBpp0075926,FBpp0076077,FBpp0076238,FBpp0076312,FBpp0077473,FBpp0078078,FBpp0078450,FBpp0078532,FBpp0078684,FBpp0078850,FBpp0078951,FBpp0079697,FBpp0079812,FBpp0080129,FBpp0080143,FBpp0080419,FBp…	Aats-cys,Aats-gln,Aats-trp,Acer,Ance,Arc42,CG10602,CG10688,CG10777,CG11999,CG12173,CG17333,CG17544,CG17560,CG1774,CG2107,CG2118,CG32444,CG4847,CG5009,CG6415,CG8778,CG8891,CG9510,CG9527,CG9577,CG9769,CSN6,Cnx99A,Cyt-b5-r,DCP1,Fad2,Fatp,Galt,Idgf3,Mal-A6,Mal-A7,Mcm5,Mcm6,Mcm7,Mtp,Nat1,Nsun2,Oscillin,Prosbeta1,Rab5,RfC38,RfC4,RpL17,RpL8,SF2,Spat,ade2,alt,bur,eIF4AIII,eIF5,mRpL12,mRpL46,mRpS23,mRpS5,…
GO:0044249	cellular biosynthetic process	34	1350	0.00039	FBpp0070875,FBpp0070913,FBpp0070940,FBpp0072659,FBpp0072801,FBpp0072848,FBpp0073120,FBpp0073947,FBpp0075693,FBpp0076238,FBpp0076312,FBpp0078450,FBpp0078532,FBpp0078684,FBpp0078850,FBpp0079812,FBpp0080143,FBpp0081460,FBpp0081556,FBpp0081756,FBpp0082177,FBpp0082476,FBpp0083227,FBpp0084240,FBpp0086373,FBpp0088433,FBpp0088675,FBpp0110208,FBpp0110439,FBpp0289058,FBpp0289859,FBpp0289893,FBpp0290556,FBp…	Aats-cys,Aats-gln,Aats-trp,Arc42,CG10602,CG10688,CG11999,CG12173,CG2107,CG8891,CG9510,CG9769,Cnx99A,Fatp,Mcm5,Mcm6,Mcm7,RfC38,RfC4,RpL17,RpL8,Spat,SpdS,ade2,alt,bur,eIF5,mRpL12,mRpL46,mRpS23,mRpS5,pic,r,smp-30
GO:0046395	carboxylic acid catabolic process	8	73	0.00039	FBpp0070006,FBpp0070875,FBpp0072848,FBpp0079697,FBpp0080759,FBpp0086993,FBpp0088517,FBpp0113095	CG17544,CG2107,CG5009,CG6415,CG8778,CG9527,CG9577,Spat
GO:1901576	organic substance biosynthetic process	35	1397	0.00039	FBpp0070875,FBpp0070913,FBpp0070940,FBpp0072659,FBpp0072801,FBpp0072848,FBpp0073120,FBpp0073947,FBpp0075693,FBpp0076238,FBpp0076312,FBpp0078450,FBpp0078532,FBpp0078684,FBpp0078850,FBpp0079812,FBpp0080143,FBpp0081460,FBpp0081556,FBpp0081756,FBpp0082177,FBpp0082476,FBpp0082780,FBpp0083227,FBpp0084240,FBpp0086373,FBpp0088433,FBpp0088675,FBpp0110208,FBpp0110439,FBpp0289058,FBpp0289859,FBpp0289893,FBp…	Aats-cys,Aats-gln,Aats-trp,Arc42,CG10602,CG10688,CG11999,CG12173,CG17560,CG2107,CG8891,CG9510,CG9769,Cnx99A,Fatp,Mcm5,Mcm6,Mcm7,RfC38,RfC4,RpL17,RpL8,Spat,SpdS,ade2,alt,bur,eIF5,mRpL12,mRpL46,mRpS23,mRpS5,pic,r,smp-30
GO:0071704	organic substance metabolic process	73	4432	0.0012	FBpp0070006,FBpp0070637,FBpp0070862,FBpp0070875,FBpp0070913,FBpp0070940,FBpp0071084,FBpp0071406,FBpp0072132,FBpp0072659,FBpp0072801,FBpp0072848,FBpp0073120,FBpp0073235,FBpp0073947,FBpp0074054,FBpp0074480,FBpp0075693,FBpp0075926,FBpp0076077,FBpp0076238,FBpp0076312,FBpp0077473,FBpp0078078,FBpp0078450,FBpp0078532,FBpp0078684,FBpp0078850,FBpp0078951,FBpp0079697,FBpp0079812,FBpp0080129,FBpp0080143,FBp…	Aats-cys,Aats-gln,Aats-trp,Acer,Ance,Arc42,CG10602,CG10688,CG10777,CG11999,CG12173,CG17333,CG17544,CG17560,CG1774,CG2107,CG2118,CG32444,CG4847,CG5009,CG6415,CG8778,CG8891,CG9510,CG9527,CG9577,CG9769,CSN6,Cnx99A,Cyt-b5-r,DCP1,Fad2,Fatp,Galt,Gip,Idgf3,Mal-A6,Mal-A7,Mcm5,Mcm6,Mcm7,Mtp,Nat1,Nsun2,Oscillin,Prosbeta1,Rab5,RfC38,RfC4,RpL17,RpL8,SF2,Spat,SpdS,ade2,alt,bur,eIF4AIII,eIF5,mRpL12,mRpL46,mRpS…
GO:1901566	organonitrogen compound biosynthetic process	23	788	0.0013	FBpp0070875,FBpp0070940,FBpp0072659,FBpp0072801,FBpp0073947,FBpp0075693,FBpp0076238,FBpp0078450,FBpp0078532,FBpp0078850,FBpp0080143,FBpp0081460,FBpp0081556,FBpp0084240,FBpp0086373,FBpp0088433,FBpp0088675,FBpp0110208,FBpp0110439,FBpp0289058,FBpp0289893,FBpp0290556,FBpp0300412	Aats-cys,Aats-gln,Aats-trp,CG10602,CG10688,CG11999,CG12173,CG9510,CG9769,Cnx99A,RpL17,RpL8,Spat,SpdS,ade2,alt,bur,eIF5,mRpL12,mRpL46,mRpS23,mRpS5,r
GO:0044237	cellular metabolic process	67	3966	0.0015	FBpp0070006,FBpp0070637,FBpp0070862,FBpp0070875,FBpp0070913,FBpp0070940,FBpp0071084,FBpp0071406,FBpp0072132,FBpp0072659,FBpp0072801,FBpp0072848,FBpp0073120,FBpp0073235,FBpp0073947,FBpp0074480,FBpp0075693,FBpp0075926,FBpp0076077,FBpp0076142,FBpp0076238,FBpp0076312,FBpp0077473,FBpp0078450,FBpp0078532,FBpp0078684,FBpp0078850,FBpp0079697,FBpp0079812,FBpp0080143,FBpp0080419,FBpp0080759,FBpp0081324,FBp…	Aats-cys,Aats-gln,Aats-trp,Arc42,CG10602,CG10688,CG10777,CG11999,CG12173,CG17333,CG17544,CG17560,CG1774,CG2107,CG2118,CG4847,CG5009,CG6415,CG8778,CG8891,CG9510,CG9527,CG9577,CG9769,CSN6,Cnx99A,DCP1,Fad2,Fatp,Gip,Idgf3,Mal-A6,Mal-A7,Mcm5,Mcm6,Mcm7,Nat1,Nsun2,Oscillin,Prosbeta1,Rab5,RfC38,RfC4,RpL17,RpL8,SF2,SH3PX1,Spat,SpdS,ade2,alt,bur,eIF4AIII,eIF5,mRpL12,mRpL46,mRpS23,mRpS5,pic,pont,r,smp-30,st…
GO:0043604	amide biosynthetic process	14	336	0.0017	FBpp0070940,FBpp0072659,FBpp0072801,FBpp0073947,FBpp0076238,FBpp0078532,FBpp0080143,FBpp0081460,FBpp0084240,FBpp0086373,FBpp0088433,FBpp0088675,FBpp0110439,FBpp0300412	Aats-cys,Aats-gln,Aats-trp,CG10602,CG9769,RpL17,RpL8,alt,eIF5,mRpL12,mRpL46,mRpS23,mRpS5,r
GO:0006412	translation	13	304	0.0024	FBpp0070940,FBpp0072659,FBpp0072801,FBpp0073947,FBpp0076238,FBpp0078532,FBpp0080143,FBpp0081460,FBpp0084240,FBpp0086373,FBpp0088433,FBpp0110439,FBpp0300412	Aats-cys,Aats-gln,Aats-trp,CG10602,CG9769,RpL17,RpL8,alt,eIF5,mRpL12,mRpL46,mRpS23,mRpS5
GO:0006520	cellular amino acid metabolic process	9	151	0.0033	FBpp0070875,FBpp0079697,FBpp0081460,FBpp0084240,FBpp0086373,FBpp0088675,FBpp0289058,FBpp0289893,FBpp0300203	Aats-cys,Aats-gln,Aats-trp,CG12173,CG2118,CG6415,CG9510,Spat,r
GO:0009987	cellular process	98	6847	0.0033	FBpp0070006,FBpp0070637,FBpp0070862,FBpp0070875,FBpp0070913,FBpp0070940,FBpp0071084,FBpp0071149,FBpp0071150,FBpp0071406,FBpp0072132,FBpp0072659,FBpp0072801,FBpp0072848,FBpp0073120,FBpp0073235,FBpp0073947,FBpp0074020,FBpp0074054,FBpp0074480,FBpp0075693,FBpp0075926,FBpp0076077,FBpp0076142,FBpp0076238,FBpp0076312,FBpp0076460,FBpp0077424,FBpp0077473,FBpp0077549,FBpp0078393,FBpp0078450,FBpp0078532,FBp…	Aats-cys,Aats-gln,Aats-trp,Ance,Arc42,Arp3,Arpc4,BicC,Bsg,Bub3,CG10602,CG10688,CG10777,CG11999,CG12173,CG12321,CG17333,CG17544,CG17560,CG1774,CG2107,CG2118,CG3270,CG4847,CG5009,CG6415,CG8778,CG8891,CG9510,CG9527,CG9577,CG9769,CG9911,CSN6,Cnx99A,Cp36,Cp7Fc,DCP1,Dmn,Drp1,Eaat1,Fad2,Fatp,Gip,Idgf3,Khc,Kr-h2,Mal-A6,Mal-A7,Mcm5,Mcm6,Mcm7,Mcr,Mtp,Nat1,Nsun2,Oscillin,Prosbeta1,Rab4,Rab5,RfC38,RfC4,RpL17…
GO:0043603	cellular amide metabolic process	16	467	0.0034	FBpp0070940,FBpp0072659,FBpp0072801,FBpp0073947,FBpp0076238,FBpp0078532,FBpp0080143,FBpp0081460,FBpp0082780,FBpp0084240,FBpp0085159,FBpp0086373,FBpp0088433,FBpp0088675,FBpp0110439,FBpp0300412	Aats-cys,Aats-gln,Aats-trp,CG10602,CG17560,CG1774,CG9769,RpL17,RpL8,alt,eIF5,mRpL12,mRpL46,mRpS23,mRpS5,r
GO:0032787	monocarboxylic acid metabolic process	9	158	0.0041	FBpp0070006,FBpp0070875,FBpp0071406,FBpp0072848,FBpp0080759,FBpp0086993,FBpp0088517,FBpp0113095,FBpp0289859	CG17544,CG2107,CG5009,CG8778,CG9527,CG9577,Fatp,Gip,Spat
GO:0009059	macromolecule biosynthetic process	23	884	0.0047	FBpp0070913,FBpp0070940,FBpp0072659,FBpp0072801,FBpp0073120,FBpp0073947,FBpp0075693,FBpp0076238,FBpp0076312,FBpp0078450,FBpp0078532,FBpp0079812,FBpp0080143,FBpp0081460,FBpp0081756,FBpp0082177,FBpp0083227,FBpp0084240,FBpp0086373,FBpp0088433,FBpp0110208,FBpp0110439,FBpp0300412	Aats-cys,Aats-gln,Aats-trp,Arc42,CG10602,CG10688,CG11999,CG9769,Cnx99A,Mcm5,Mcm6,Mcm7,RfC38,RfC4,RpL17,RpL8,alt,eIF5,mRpL12,mRpL46,mRpS23,mRpS5,pic
GO:0033539	fatty acid beta-oxidation using acyl-CoA dehydrogenase	3	7	0.007	FBpp0080759,FBpp0088517,FBpp0113095	CG17544,CG5009,CG9527
GO:0034645	cellular macromolecule biosynthetic process	22	863	0.0085	FBpp0070913,FBpp0070940,FBpp0072659,FBpp0072801,FBpp0073120,FBpp0073947,FBpp0075693,FBpp0076238,FBpp0076312,FBpp0078450,FBpp0078532,FBpp0079812,FBpp0080143,FBpp0081460,FBpp0081756,FBpp0082177,FBpp0083227,FBpp0084240,FBpp0086373,FBpp0088433,FBpp0110439,FBpp0300412	Aats-cys,Aats-gln,Aats-trp,Arc42,CG10602,CG10688,CG11999,CG9769,Mcm5,Mcm6,Mcm7,RfC38,RfC4,RpL17,RpL8,alt,eIF5,mRpL12,mRpL46,mRpS23,mRpS5,pic
GO:0043254	regulation of protein complex assembly	7	103	0.0085	FBpp0072132,FBpp0076460,FBpp0077549,FBpp0078831,FBpp0292041,FBpp0293269,FBpp0301099	Arp3,Arpc4,DCP1,SC35,SF2,Sec23,cpb
GO:0006631	fatty acid metabolic process	7	105	0.0091	FBpp0070006,FBpp0072848,FBpp0080759,FBpp0086993,FBpp0088517,FBpp0113095,FBpp0289859	CG17544,CG2107,CG5009,CG8778,CG9527,CG9577,Fatp
GO:0009056	catabolic process	21	817	0.0099	FBpp0070006,FBpp0070875,FBpp0072132,FBpp0072848,FBpp0076142,FBpp0078078,FBpp0078450,FBpp0078684,FBpp0078951,FBpp0079697,FBpp0080419,FBpp0080759,FBpp0082177,FBpp0084574,FBpp0086091,FBpp0086400,FBpp0086993,FBpp0088517,FBpp0113095,FBpp0297903,FBpp0300412	CG10602,CG11999,CG17544,CG2107,CG32444,CG4847,CG5009,CG6415,CG8778,CG8891,CG9527,CG9577,DCP1,Galt,Idgf3,Oscillin,Prosbeta1,SH3PX1,Spat,pic,wdb
GO:0044271	cellular nitrogen compound biosynthetic process	22	881	0.01	FBpp0070913,FBpp0070940,FBpp0072659,FBpp0072801,FBpp0073947,FBpp0075693,FBpp0076238,FBpp0078532,FBpp0078684,FBpp0078850,FBpp0080143,FBpp0081460,FBpp0081556,FBpp0082177,FBpp0083227,FBpp0084240,FBpp0086373,FBpp0088433,FBpp0088675,FBpp0110439,FBpp0290556,FBpp0300412	Aats-cys,Aats-gln,Aats-trp,Arc42,CG10602,CG10688,CG8891,CG9769,Mcm6,RpL17,RpL8,SpdS,ade2,alt,bur,eIF5,mRpL12,mRpL46,mRpS23,mRpS5,pic,r
GO:0005975	carbohydrate metabolic process	10	236	0.0132	FBpp0073235,FBpp0075693,FBpp0078078,FBpp0078951,FBpp0080419,FBpp0082476,FBpp0084221,FBpp0087836,FBpp0271830,FBpp0297903	CG10688,CG17333,CG32444,Galt,Idgf3,Mal-A6,Mal-A7,Oscillin,smp-30,tobi
GO:0006518	peptide metabolic process	13	393	0.0166	FBpp0070940,FBpp0072659,FBpp0072801,FBpp0073947,FBpp0076238,FBpp0078532,FBpp0080143,FBpp0081460,FBpp0084240,FBpp0086373,FBpp0088433,FBpp0110439,FBpp0300412	Aats-cys,Aats-gln,Aats-trp,CG10602,CG9769,RpL17,RpL8,alt,eIF5,mRpL12,mRpL46,mRpS23,mRpS5
GO:1901575	organic substance catabolic process	19	735	0.0166	FBpp0070006,FBpp0070875,FBpp0072132,FBpp0072848,FBpp0078078,FBpp0078450,FBpp0078684,FBpp0078951,FBpp0079697,FBpp0080419,FBpp0080759,FBpp0082177,FBpp0086091,FBpp0086400,FBpp0086993,FBpp0088517,FBpp0113095,FBpp0297903,FBpp0300412	CG10602,CG11999,CG17544,CG2107,CG32444,CG4847,CG5009,CG6415,CG8778,CG8891,CG9527,CG9577,DCP1,Galt,Idgf3,Oscillin,Prosbeta1,Spat,pic
GO:0050821	protein stabilization	4	30	0.0174	FBpp0081351,FBpp0083658,FBpp0087398,FBpp0110208	CSN6,Cnx99A,Sgt1,trsn
GO:1901605	alpha-amino acid metabolic process	6	87	0.0179	FBpp0070875,FBpp0079697,FBpp0088675,FBpp0289058,FBpp0289893,FBpp0300203	CG12173,CG2118,CG6415,CG9510,Spat,r
GO:0055114	oxidation-reduction process	18	690	0.0198	FBpp0070006,FBpp0072848,FBpp0075926,FBpp0077468,FBpp0078357,FBpp0078370,FBpp0080759,FBpp0081141,FBpp0082780,FBpp0083227,FBpp0085457,FBpp0086993,FBpp0087997,FBpp0088517,FBpp0099966,FBpp0113095,FBpp0292905,FBpp0304264	Arc42,CG10097,CG12171,CG1236,CG17544,CG17560,CG2064,CG2107,CG3270,CG3609,CG4747,CG5009,CG8778,CG9527,CG9577,Cyt-b5-r,Fad2,Sodh-1
GO:0032989	cellular component morphogenesis	17	632	0.0199	FBpp0070913,FBpp0071150,FBpp0076460,FBpp0077473,FBpp0077549,FBpp0078393,FBpp0078831,FBpp0078905,FBpp0079196,FBpp0080968,FBpp0081460,FBpp0082177,FBpp0083266,FBpp0084240,FBpp0086328,FBpp0290556,FBpp0302999	Aats-gln,Aats-trp,Arp3,Arpc4,Bsg,Cp36,Khc,Mcm6,Mtp,Rab5,Sec24CD,Tig,bur,cpb,kra,ninaE,pic
GO:0045451	pole plasm oskar mRNA localization	4	32	0.0199	FBpp0072132,FBpp0081324,FBpp0086328,FBpp0087722	DCP1,Dmn,Khc,eIF4AIII
GO:0007028	cytoplasm organization	5	59	0.0204	FBpp0072132,FBpp0077473,FBpp0081324,FBpp0086328,FBpp0087722	DCP1,Dmn,Khc,Rab5,eIF4AIII
GO:0003331	positive regulation of extracellular matrix constituent secretion	2	2	0.0221	FBpp0301099,FBpp0302999	Sec23,Sec24CD
GO:0046487	glyoxylate metabolic process	2	2	0.0221	FBpp0070875,FBpp0071406	Gip,Spat
GO:1901607	alpha-amino acid biosynthetic process	4	34	0.0221	FBpp0070875,FBpp0088675,FBpp0289058,FBpp0289893	CG12173,CG9510,Spat,r
GO:0007281	germ cell development	18	714	0.024	FBpp0070862,FBpp0070913,FBpp0071149,FBpp0071150,FBpp0072132,FBpp0074054,FBpp0076077,FBpp0076460,FBpp0077473,FBpp0077549,FBpp0078393,FBpp0080129,FBpp0081324,FBpp0082177,FBpp0083658,FBpp0086008,FBpp0086328,FBpp0087722	Ance,Arp3,CSN6,Cp36,Cp7Fc,DCP1,Dmn,Khc,Mcm6,Rab4,Rab5,cpb,eIF4AIII,kra,pic,rngo,vnc,wuho
GO:0034641	cellular nitrogen compound metabolic process	36	1954	0.0244	FBpp0070637,FBpp0070862,FBpp0070913,FBpp0070940,FBpp0071084,FBpp0072132,FBpp0072659,FBpp0072801,FBpp0073120,FBpp0073235,FBpp0073947,FBpp0075693,FBpp0076238,FBpp0076312,FBpp0078532,FBpp0078684,FBpp0078850,FBpp0079812,FBpp0080143,FBpp0081324,FBpp0081460,FBpp0081556,FBpp0081756,FBpp0082177,FBpp0082780,FBpp0083227,FBpp0084240,FBpp0085159,FBpp0086373,FBpp0087398,FBpp0088433,FBpp0088675,FBpp0110439,FBp…	Aats-cys,Aats-gln,Aats-trp,Arc42,CG10602,CG10688,CG10777,CG17333,CG17560,CG1774,CG8891,CG9769,DCP1,Mcm5,Mcm6,Mcm7,Nsun2,RfC38,RfC4,RpL17,RpL8,SF2,SpdS,ade2,alt,bur,eIF4AIII,eIF5,mRpL12,mRpL46,mRpS23,mRpS5,pic,r,trsn,wuho
GO:0048477	oogenesis	16	597	0.0245	FBpp0070862,FBpp0070913,FBpp0071149,FBpp0071150,FBpp0072132,FBpp0074054,FBpp0076077,FBpp0076460,FBpp0077473,FBpp0077549,FBpp0078393,FBpp0081324,FBpp0082177,FBpp0086008,FBpp0086328,FBpp0087722	Arp3,Cp36,Cp7Fc,DCP1,Dmn,Khc,Mcm6,Rab4,Rab5,cpb,eIF4AIII,kra,pic,rngo,vnc,wuho
GO:0008652	cellular amino acid biosynthetic process	4	37	0.0266	FBpp0070875,FBpp0088675,FBpp0289058,FBpp0289893	CG12173,CG9510,Spat,r
GO:0044248	cellular catabolic process	18	727	0.0273	FBpp0070006,FBpp0070875,FBpp0072132,FBpp0072848,FBpp0076142,FBpp0078450,FBpp0078684,FBpp0079697,FBpp0080419,FBpp0080759,FBpp0082177,FBpp0084574,FBpp0086091,FBpp0086400,FBpp0086993,FBpp0088517,FBpp0113095,FBpp0300412	CG10602,CG11999,CG17544,CG2107,CG4847,CG5009,CG6415,CG8778,CG8891,CG9527,CG9577,DCP1,Idgf3,Prosbeta1,SH3PX1,Spat,pic,wdb
GO:0044283	small molecule biosynthetic process	9	231	0.0301	FBpp0070875,FBpp0072848,FBpp0078684,FBpp0082476,FBpp0088675,FBpp0289058,FBpp0289859,FBpp0289893,FBpp0290556	CG12173,CG2107,CG8891,CG9510,Fatp,Spat,bur,r,smp-30
GO:0006526	arginine biosynthetic process	2	3	0.0302	FBpp0088675,FBpp0289058	CG9510,r
GO:0033036	macromolecule localization	18	738	0.0302	FBpp0072132,FBpp0074528,FBpp0075693,FBpp0076142,FBpp0076460,FBpp0078823,FBpp0080361,FBpp0080968,FBpp0081074,FBpp0081324,FBpp0083319,FBpp0086328,FBpp0087722,FBpp0289859,FBpp0293269,FBpp0301099,FBpp0301847,FBpp0302999	Arp3,BicC,CG10688,DCP1,Dmn,Fatp,Khc,Kr-h2,Mtp,Ranbp21,SF2,SH3PX1,Sec22,Sec23,Sec24CD,Srp72,alpha-Est7,eIF4AIII
GO:0048081	positive regulation of cuticle pigmentation	2	3	0.0302	FBpp0301099,FBpp0302999	Sec23,Sec24CD
GO:0048646	anatomical structure formation involved in morphogenesis	14	506	0.0328	FBpp0070913,FBpp0071149,FBpp0071150,FBpp0074054,FBpp0076460,FBpp0077424,FBpp0077473,FBpp0079196,FBpp0080129,FBpp0080968,FBpp0082177,FBpp0086328,FBpp0301099,FBpp0302999	Ance,Arp3,Bsg,Cp36,Cp7Fc,Drp1,Khc,Mcm6,Mtp,Rab5,Sec23,Sec24CD,pic,rngo
GO:0000902	cell morphogenesis	14	513	0.0366	FBpp0076460,FBpp0077473,FBpp0077549,FBpp0078393,FBpp0078831,FBpp0078905,FBpp0079196,FBpp0080968,FBpp0081460,FBpp0083266,FBpp0084240,FBpp0086328,FBpp0290556,FBpp0302999	Aats-gln,Aats-trp,Arp3,Arpc4,Bsg,Khc,Mtp,Rab5,Sec24CD,Tig,bur,cpb,kra,ninaE
GO:0006261	DNA-dependent DNA replication	5	74	0.0368	FBpp0070913,FBpp0073120,FBpp0076312,FBpp0079812,FBpp0081756	Mcm5,Mcm6,Mcm7,RfC38,RfC4
GO:0035149	lumen formation, open tracheal system	3	19	0.0371	FBpp0080968,FBpp0301099,FBpp0302999	Mtp,Sec23,Sec24CD
GO:0034394	protein localization to cell surface	2	4	0.0383	FBpp0301099,FBpp0302999	Sec23,Sec24CD
GO:0030011	maintenance of cell polarity	3	20	0.0408	FBpp0081351,FBpp0301099,FBpp0302999	Sec23,Sec24CD,Sgt1
GO:0051049	regulation of transport	9	249	0.0408	FBpp0070399,FBpp0074528,FBpp0076142,FBpp0077473,FBpp0086008,FBpp0087722,FBpp0110208,FBpp0301099,FBpp0302999	CG3078,Cnx99A,Dmn,Rab4,Rab5,Ranbp21,SH3PX1,Sec23,Sec24CD
GO:0030707	ovarian follicle cell development	10	306	0.0453	FBpp0070913,FBpp0071149,FBpp0071150,FBpp0076460,FBpp0077473,FBpp0077549,FBpp0078393,FBpp0082177,FBpp0086008,FBpp0086328	Arp3,Cp36,Cp7Fc,Khc,Mcm6,Rab4,Rab5,cpb,kra,pic
GO:0006270	DNA replication initiation	3	22	0.0487	FBpp0070913,FBpp0076312,FBpp0081756	Mcm5,Mcm6,Mcm7
GO:0006525	arginine metabolic process	2	5	0.0487	FBpp0088675,FBpp0289058	CG9510,r
GO:0060341	regulation of cellular localization	6	120	0.0487	FBpp0074528,FBpp0076142,FBpp0086328,FBpp0087722,FBpp0110208,FBpp0301099	Cnx99A,Dmn,Khc,Ranbp21,SH3PX1,Sec23
