# Supplementary material for: miR-125-chinmo pathway regulates dietary restriction-dependent enhancement of lifespan in Drosophila
Source: eLife. 2021 Jun 8;10:e62621. doi: 10.7554/eLife.62621 (PMC8233039; doi:10.7554/eLife.62621)
Supplement: Figure 8—figure supplement 1—source data 2. [file elife-62621-fig8-figsupp1-data2.xlsx]

## Sheet: Survival Fig8_Fig Supplement8A
Days	AL+	AL-	DR+	DR-
0	100	100	100	100
12		99.2063		99.187
14		97.619
16	98.4127
18	94.4444		98.3607
20	88.8889	95.2381
22	77.7778	86.5079	97.541
24	74.6032	81.746
26	57.1429	74.6032	94.2623	97.561
28	45.2381	61.9048	93.4426	95.935
30	34.127	47.619	90.9836
32	24.6032	28.5714	88.5246	93.4959
34	19.8413	19.8413	85.2459	92.6829
36	13.4921	13.4921	81.9672
38	11.9048	12.6984	79.5082	86.9919
40	8.73016	10.3175	72.9508	82.1138
42		6.34921	68.0328	79.6748
44	7.14286	3.96825	57.377	78.8618
46		2.38095	49.1803	74.7967
48	6.34921	1.5873	44.2623	66.6667
50			38.5246	62.6016
52	3.1746	0.793651	23.7705	47.9675
54	0.793651	0	18.8525	33.3333
56	0		15.5738	29.2683
58			14.7541
60			11.4754	14.6341
62			10.6557	13.8211
64				12.1951
66				10.5691
68				1.62602
70			5.7377	0
72			0
