# Supplementary material for: miR-125-chinmo pathway regulates dietary restriction-dependent enhancement of lifespan in Drosophila
Source: eLife. 2021 Jun 8;10:e62621. doi: 10.7554/eLife.62621 (PMC8233039; doi:10.7554/eLife.62621)
Supplement: Figure 8—source data 2. [file elife-62621-fig8-data2.xlsx]

## Sheet: Survival_Fig8C Exp 1
DAYS	DR+RU	DR+ETOH	AL+RU	AL+ETOH
0	100	100	100	100
6	99.2593	98.9899		98.9247
8		97.9798		96.7742
10		96.9697	98.6207	95.6989
12			97.931	92.4731
14	98.5185	95.9596	94.4828	91.3978
16		94.9495
18	97.037	92.9293	93.1034	90.3226
20		87.8788	91.0345	86.0215
22	93.3333			81.7204
24	89.6296	79.798	88.9655	67.7419
26	87.4074	73.7374	86.8966
28			80.6897	55.914
30	83.7037	64.6465	72.4138	51.6129
32	80.7407		51.7241	39.7849
34	77.037	58.5859	49.6552	24.7312
36	69.6296	52.5253	35.8621	17.2043
38	62.963	48.4848	28.9655	16.129
40	60	33.3333	20.6897	15.0538
42	52.5926	29.2929	15.8621	2.15054
44	48.8889	18.1818	14.4828
46	46.6667	15.1515	11.7241	0
48	34.0741	12.1212	0.689655
50	27.4074	7.07071
52	22.963
54	20.7407	4.0404
56	19.2593	3.0303
58	16.2963
60	15.5556
62	14.8148
66	14.0741		0
68		1.0101
70	13.3333
74		0
76	9.62963
82	8.14815
84	5.92593
86	4.44444
88	3.7037
90	1.48148
92	0

## Sheet: Survival_Fig 8C Exp 2
DAYS	AL+ETOH	AL+RU	DR+ETOH	DR+RU
0	100	100	100	100
4			99.5455	99.6063
6	99.4872		98.6364	98.8189
8	95.3846
10	93.8462		98.1818	98.0315
12	91.7949
14	89.7436	97.3799	96.8182	97.6378
16	89.2308	96.5066	96.3636
18	86.1538	93.4498
20	84.6154	92.1397	95.9091	95.2756
22	80.5128	90.8297	95.4545	94.8819
24	74.359	89.9563	94.0909	92.9134
26	68.7179	87.3362	92.2727	92.126
28	53.8462	80.786		91.7323
30	47.1795	72.4891	91.3636	87.4016
32	40	59.8253	82.7273	86.6142
34	34.359	49.7817	80	82.6772
36	27.6923	42.3581	73.1818	79.1339
38	24.1026	36.6812	70	78.3465
40	18.9744	32.3144	60	70.0787
42	12.8205	25.7642	46.8182	67.7165
44	6.15385	21.3974	41.8182	59.0551
46	5.12821	18.7773	32.2727	51.5748
48	4.10256	15.2838	29.0909	44.0945
50	3.07692	13.5371	20.9091	41.3386
52	0.512821	12.2271	19.5455	39.7638
54	0	10.0437	18.1818	35.4331
56		8.73362	14.0909	31.8898
58		8.29694	8.18182	31.1024
60		7.42358	7.27273	28.3465
62		4.36681	5.90909	25.1969
64		2.18341	5	22.4409
66		1.74672	4.54545	21.2598
68		0		18.1102
70			4.09091	16.5354
72			2.72727	14.9606
74			1.36364	11.811
76			0.909091
78				10.2362
80				6.69291
82			0.454545	5.51181
84			0	5.11811
86				3.93701
88				2.3622
92				1.1811
94				0.787402
96				0

## Sheet: Survival_Fig 8 Fig Supp 1A Exp1
Days	AL+E	AL+RU	DR+E	DR+RU
0	100	100	100	100
2	91.5663		99.2188	99.2126
4	90.3614	98.7952		98.4252
6	89.1566	97.5904
8	86.747	96.3855	97.6562	97.6378
10	83.1325	95.1807		96.8504
12	81.9277	92.7711	94.5312	96.063
14		91.5663	92.1875	94.4882
16		89.1566	89.8438	86.6142
18		86.747	89.0625	83.4646
20	74.6988	75.9036	85.1562	82.6772
22	68.6747	67.4699	82.0312	81.1024
24	51.8072	59.0361	71.0938	77.1654
26	45.7831	49.3976	64.8438	72.4409
28	28.9157	46.988	60.1562	71.6535
30	15.6627	36.1446	53.9062	59.8425
32	3.61446	22.8916	52.3438	56.6929
34	1.20482	20.4819	47.6562	46.4567
36	0	8.43373	43.75	41.7323
38		0	32.8125	37.0079
40			32.0312	26.7717
42			21.0938	22.0472
44				11.811
46			12.5
48			10.9375	10.2362
50			10.1562	1.5748
52			0.78125
54			0
58				0

## Sheet: Survival_Fig 8 Fig supp 1A Exp2
Days	AL+	AL-	DR+	DR-
0	100	100	100	100
12		99.2063		99.187
14		97.619
16	98.4127
18	94.4444		98.3607
20	88.8889	95.2381
22	77.7778	86.5079	97.541
24	74.6032	81.746
26	57.1429	74.6032	94.2623	97.561
28	45.2381	61.9048	93.4426	95.935
30	34.127	47.619	90.9836
32	24.6032	28.5714	88.5246	93.4959
34	19.8413	19.8413	85.2459	92.6829
36	13.4921	13.4921	81.9672
38	11.9048	12.6984	79.5082	86.9919
40	8.73016	10.3175	72.9508	82.1138
42		6.34921	68.0328	79.6748
44	7.14286	3.96825	57.377	78.8618
46		2.38095	49.1803	74.7967
48	6.34921	1.5873	44.2623	66.6667
50			38.5246	62.6016
52	3.1746	0.793651	23.7705	47.9675
54	0.793651	0	18.8525	33.3333
56	0		15.5738	29.2683
58			14.7541
60			11.4754	14.6341
62			10.6557	13.8211
64				12.1951
66				10.5691
68				1.62602
70			5.7377	0
72			0
